# Supplementary material for: A <span aria-describedby="tippy-18">Comparison of Clinical Outcomes of Robot-Assisted and Conventional Laparoscopic Surgery
Source: Preprints.org preprint supplement (doi:10.20944/preprints202312.0246.v1), 2023-12-05
Supplement: Supplementary file 1 [file Table AMSTAR 2 Quality Assessment.xlsx]

## Sheet: QA AMSTAR 2
AMSTAR 2 Quality Assessment
Article	Reference	Category	Specific surgical procedure(s)	SR / MA / NMA	Overall quality ranking	Q1	Q2	Q3	Q4	Q5	Q6	Q7	Q8	Q9	Q10	Q11	Q12	Q13	Q14	Q15	Q16	Number of critical flaws	Number of non-critical flaws
Du et al. (2018)	{RN1}	prostatectomy	radical prostatectomy	MA	Critical low	Y	N	N	PY	Y	Y	N	PY	N	N	Y	N	N	Y	Y	Y	4	3
Carbonara et al. (2021)	{RN3}	prostatectomy	radical prostatectomy	MA	Critical low	Y	N	N	Y	Y	Y	N	Y	Y	N	Y	N	N	Y	N	Y	4	3
Wang et al. (2019)	{RN4}	prostatectomy	radical prostatectomy	MA	Critical low	Y	N	N	PY	Y	Y	N	N	Y	N	Y	N	N	N	N	Y	4	5
Pandolfo et al. (2022)	{RN7}	prostatectomy	simple prostatectomy	MA	Critical low	Y	Y	N	PY	Y	Y	N	N	Y	N	Y	Y	Y	N	N	Y	2	4
Li et al. (2022)	{RN9}	prostatectomy	simple prostatectomy	MA	Critical low	Y	N	Y	Y	N	Y	N	Y	Y	N	Y	Y	Y	Y	N	Y	3	2
Kordan et al. (2020)	{RN10}	prostatectomy	simple prostatectomy	SR	Critical low	Y	N	N	PY	Y	N	N	N	N	N	-	-	N	N	-	Y	4	5
Larkins et al. (2022)	{RN248}	colectomy	Colectomy diverticular resection	MA	Critical low	N	Y	N	PY	Y	N	N	Y	Y	N	Y	N	N	Y	Y	Y	2	5
Bianchi et al. (2022)	{RN255}	colectomy	Multiquadrant colorectal procedures	MA	Low	Y	Y	Y	PY	Y	Y	N	Y	Y	N	Y	Y	Y	Y	Y	Y	1	1
Sheng et al. (2018)	{RN259}	colectomy	Colorectal cancer resection surgery	NMA	Critical low	Y	N	N	PY	N	Y	N	Y	Y	N	Y	N	Y	N	N	Y	3	5
Giuliani et al. (2022)	{RN241}	colectomy	Colorectal resection for left-sided DD	MA	Low	Y	Y	Y	Y	Y	Y	N	Y	Y	N	Y	N	Y	N	Y	Y	1	3
Cuk et al. (2022)	{RN245}	colectomy	Colorectal cancer resection surgery	MA	Low	Y	Y	Y	Y	Y	N	N	Y	Y	N	Y	Y	Y	Y	Y	Y	1	2
Ravindra et al. (2022)	{RN246}	colectomy	Colorectal cancer resection surgery	MA	Critical low	Y	N	Y	Y	N	N	N	Y	Y	N	Y	Y	Y	Y	Y	Y	2	3
Cuk et al. (2023)	{RN237}	colectomy	Complete mesocolic excision	MA	Low	Y	Y	Y	PY	Y	Y	N	Y	Y	N	Y	Y	Y	Y	Y	Y	1	1
Flynn et al. (2022)	{RN251}	colectomy	Total mesorectal excision	MA	Critical low	Y	N	Y	PY	Y	N	N	Y	Y	N	Y	N	N	N	N	Y	4	4
Gavriilidis et al. (2020)	{RN254}	colectomy	Total mesorectal excision	MA	Critical low	N	N	Y	Y	Y	Y	N	Y	Y	N	Y	Y	Y	Y	Y	Y	2	2
Jones et al. (2018)	{RN253}	colectomy	Total mesorectal excision	MA	Critical low	Y	N	N	PY	Y	Y	N	N	N	N	Y	N	N	N	N	Y	5	5
Petz et al. (2021)	{RN250}	colectomy	Complete mesocolic excision	SR	Critical low	N	N	N	PY	N	N	N	N	Y	N	-	-	N	N	-	Y	3	7
Rausa et al. (2019)	{RN262}	colectomy	Total mesorectal excision	NMA	Critical low	Y	Y	Y	PY	Y	Y	N	PY	Y	N	Y	Y	Y	Y	N	Y	2	1
Flynn et al. (2021)	{RN256}	colectomy	proctocolectomy with IPAA	MA	Critical low	Y	N	N	PY	N	N	N	PY	Y	N	Y	N	Y	Y	N	Y	3	5
Roh et al. (2018)	{RN201}	cholecystectomy, colectomy, hysterectomy, nephrectomy, prostatectomy	multiple	MA	Low	Y	Y	Y	PY	Y	Y	N	Y	Y	N	Y	Y	Y	Y	Y	Y	1	1
Solaini et al. (2022)	{RN247}	colectomy	left hemicolectomy	MA	Low	N	N	Y	Y	Y	N	Y	Y	Y	N	Y	Y	Y	Y	Y	Y	1	3
Genova et al. (2021)	{RN243}	colectomy	right hemicolectomy	MA	Critical low	Y	N	Y	Y	Y	Y	N	PY	Y	N	Y	Y	Y	Y	Y	Y	2	1
Lauka et al. (2020)	{RN236}	colectomy	right hemicolectomy	MA	Critical low	Y	N	N	Y	Y	Y	N	PY	Y	N	Y	Y	Y	Y	Y	Y	2	2
Ma et al. (2019)	{RN242}	colectomy	right hemicolectomy	MA	Critical low	Y	N	N	Y	Y	Y	N	Y	N	N	Y	N	Y	Y	Y	Y	3	3
Rausa et al. (2019)	{RN258}	colectomy	right hemicolectomy	NMA	Low	Y	Y	Y	PY	N	Y	N	PY	Y	N	Y	Y	Y	Y	Y	Y	1	2
Solaini et al. (2018)	{RN240}	colectomy	right hemicolectomy	MA	Critical low	N	N	N	PY	Y	N	N	Y	Y	N	Y	Y	Y	N	Y	Y	2	5
Tschann et al. (2022)	{RN239}	colectomy	right hemicolectomy	MA	Low	Y	Y	N	PY	Y	Y	N	Y	Y	N	Y	Y	Y	Y	Y	Y	1	2
Waters et al. (2020)	{RN260}	colectomy	right hemicolectomy	SR	Critical low	Y	N	N	Y	Y	N	N	PY	Y	N	-	-	Y	Y	-	Y	2	3
Zhu et al. (2021)	{RN238}	colectomy	right hemicolectomy	MA	Critical low	N	N	N	PY	Y	N	N	Y	Y	N	Y	N	N	Y	N	Y	4	5
Alshowaikh et al. (2021)	{RN187}	hysterectomy	-	SR	Critical low	Y	N	N	Y	Y	N	N	PY	Y	N	-	-	Y	Y	-	Y	2	3
Prodromidou et al. (2020)	{RN188}	hysterectomy	single-site hysterectomy	MA	Critical low	Y	N	Y	PY	Y	N	Y	Y	N	N	Y	N	N	Y	N	Y	4	3
Kampers et al. (2022)	{RN189}	hysterectomy	radical hysterectomy	MA	Critical low	N	N	N	PY	Y	Y	N	PY	Y	N	Y	Y	N	Y	N	Y	4	3
Marchand et al. (2021)	{RN191}	hysterectomy	-	MA	Critical low	Y	Y	Y	Y	N	N	N	PY	Y	N	Y	Y	Y	Y	N	Y	2	3
Zhang et al. (2019)	{RN192}	hysterectomy	radical hysterectomy	MA	Critical low	Y	N	Y	Y	Y	N	N	PY	Y	N	Y	Y	Y	Y	Y	Y	2	2
Guo et al. (2023)	{RN193}	hysterectomy	radical hysterectomy	NMA	Low	Y	Y	Y	Y	Y	Y	N	Y	Y	N	Y	Y	Y	N	Y	Y	1	2
Jin et al. (2018)	{RN194}	hysterectomy	radical hysterectomy	NMA	Critical low	Y	N	N	PY	N	Y	N	Y	Y	N	Y	Y	Y	N	Y	Y	2	4
Hwang et al. (2020)	{RN195}	hysterectomy	radical hysterectomy	MA	Critical low	Y	N	N	Y	Y	N	N	PY	N	N	Y	N	N	Y	Y	Y	4	4
Lawrie et al. (2019)	{RN200}	hysterectomy	-	MA	High	Y	Y	Y	Y	Y	Y	Y	Y	Y	N	Y	Y	Y	Y	Y	Y	0	1
Zahid et al. (2022)	{RN11}	nephrectomy	radical/partial nephrectomy, nephroureterectomy, prostatectomy	SR	Low	Y	Y	Y	Y	Y	Y	N	PY	Y	N	-	-	Y	Y	-	Y	1	1
Veccia et al. (2020)	{RN64}	nephrectomy	nephroureterectomy	MA	Critical low	Y	N	Y	Y	Y	N	N	PY	Y	N	Y	Y	Y	Y	Y	Y	2	2
Li et al. (2020)	{RN65}	nephrectomy	-	MA	Critical low	Y	Y	Y	Y	Y	Y	N	Y	Y	N	Y	Y	N	Y	Y	Y	2	1
Crocerossa et al. (2021)	{RN68}	nephrectomy	radical nephrectomy	MA	Critical low	Y	Y	N	PY	Y	Y	N	Y	Y	N	Y	N	Y	Y	N	Y	2	3
Wang et al. (2019)	{RN69}	nephrectomy	donor nephrectomy	MA	Critical low	Y	N	N	PY	N	Y	N	N	Y	N	Y	Y	Y	N	Y	Y	2	5
Sharma et al. (2022)	{RN71}	nephrectomy	partial nephrectomy	MA	Critical low	Y	Y	N	Y	Y	Y	N	Y	N	N	Y	N	N	Y	N	Y	4	3
Tang et al. (2020)	{RN72}	nephrectomy	partial nephrectomy	SR	Critical low	N	Y	Y	PY	Y	Y	N	N	Y	N	-	-	Y	Y	N	Y	2	3
Xiao et al. (2020)	{RN157}	nephrectomy	donor nephrectomy	NMA	Critical low	Y	N	Y	Y	Y	Y	N	Y	Y	N	Y	Y	Y	N	N	Y	3	2
Du et al. (2018)	{RN1}	prostatectomy	radical prostatectomy	MA	Critical low	Y	N	N	PY	Y	Y	N	PY	N	N	Y	N	N	Y	Y	Y	4	3
Carbonara et al. (2021)	{RN3}	prostatectomy	radical prostatectomy	MA	Critical low	Y	N	N	Y	Y	Y	N	Y	Y	N	Y	N	N	Y	N	Y	4	3
Wang et al. (2019)	{RN4}	prostatectomy	radical prostatectomy	MA	Critical low	Y	N	N	PY	Y	Y	N	N	Y	N	Y	N	N	N	N	Y	4	5
Pandolfo et al. (2022)	{RN7}	prostatectomy	simple prostatectomy	MA	Critical low	Y	Y	N	PY	Y	Y	N	N	Y	N	Y	Y	Y	N	N	Y	2	4
Li et al. (2022)	{RN9}	prostatectomy	simple prostatectomy	MA	Critical low	Y	N	Y	Y	N	Y	N	Y	Y	N	Y	Y	Y	Y	N	Y	3	2
Kordan et al. (2020)	{RN10}	prostatectomy	simple prostatectomy	SR	Critical low	Y	N	N	PY	Y	N	N	N	N	N	-	-	N	N	-	Y	4	5
