# Supplementary material for: A <span aria-describedby="tippy-18">Comparison of Clinical Outcomes of Robot-Assisted and Conventional Laparoscopic Surgery
Source: Preprints.org preprint supplement (doi:10.20944/preprints202312.0246.v1), 2023-12-05
Supplement: Supplementary file 2 [file Table primary sources and citation matrices.xlsx]

## Sheet: All primary sources
All primary sources per surgical category
Primary sources Cholecystectomy	Year	Primary sources Colectomy	Year	Primary sources Hysterectomy	Year	Primary sources Nephrectomy	Year	Primary sources Prostatectomy	Year
Abel 2019	2019	Abdel-Halim 2010	2010	Aiko 2020	2020	Abe 2018	2018	Aiono 2002	2002
Aggarwal 2020	2020	Adamina 2012	2012	Aiono 2002	2002	Abedali 2020	2020	Akand 2015	2015
Ahn 2015	2015	Ahmadi 2021	2021	Akdemir 2015	2015	Aboumohamed 2015	2015	Amenta 2022	2022
Aiono 2002	2002	Aiono 2002	2002	Alfonzo 2019	2019	Aiono 2002	2002	Anger 2014	2014
Albrecht 2017	2017	Al Temimi 2019	2019	Anger 2014	2014	Ambani 2013	2013	Arghami 2015	2015
Alhambra-Rodriguez de Guzman 2020	2020	Allemann 2015	2015	Asciutto 2015	2015	Anele 2019	2019	Asimakopoulos 2011	2011
Altieri 2016	2016	Allemann 2016	2016	Asimakopoulos 2011	2011	Anger 2014	2014	Autorino 2015	2015
Anger 2014	2014	Al-Temimi 2019	2019	Baik 2008	2008	Arghami 2015	2015	Baik 2008	2008
Aprea 2016	2016	An 2018	2018	Barrie 2016	2016	Ariane 2011	2011	Ball 2006	2006
Aragon 2014	2014	Anania 2012	2012	Beck 2018	2018	Asimakopoulos 2011	2011	Banapour 2014	2014
Araki 2017	2017	Anger 2014	2014	Bert 2016	2016	Bahattu 2015	2015	Barocas 2010	2010
Arezzo 2017	2017	Anvari 2004	2004	Bhattu 2015	2015	Baik 2008	2008	Barry 2012	2012
Asimakopoulos 2011	2011	Araujo 2003	2003	Bogani 2014	2014	Bargman 2006	2006	Benway 2009	2009
Autin 2015	2015	Aselmann 2018	2018	Bogani 2020	2020	Bariol 2004	2004	Bhanvadia 2021	2021
Ayabe 2018	2018	Asimakopoulos 2011	2011	Borahay 2018	2018	Beksac 2019	2019	Bhattu 2015	2015
Ayloo 2014	2014	Asklid 2019	2019	Brunes 2021	2021	Benway 2009	2009	Bochner 2015	2015
Baik 2008	2008	Asoglu 2020	2020	Cadiere 2001	2001	Berger 2008	2008	Bolenz 2009	2009
Balachandran 2017	2017	Aziz 2020	2020	Campos 2013	2013	Bhattu 2015	2015	Brandao 2014	2014
Beninato 2015	2015	Bae 2014	2014	Cela 2018	2018	Blackmur 2014	2014	Cacciamani 2018	2018
Bhattu 2015	2015	Bae 2019	2019	Chen 2014	2014	Bochner 2015	2015	Cadiere 2001	2001
Blachandran 2017	2017	Baek 2011	2011	Chen 2019	2019	Bolenz 2009	2009	Castillo 2016	2016
Blaphas 2017	2017	Baek 2012	2012	Chen B 2020	2020	Bora 2017	2017	Chan 2017	2017
Boer 2002	2002	Baek 2013	2013	Chen L 2019	2019	Branco 2008	2008	Chavali 2018	2018
Breitenstein 2008	2008	Baek JH 2011	2011	Choi 2012	2012	Brandao 2014	2014	Cho JM 2021	2021
Broderick 2015	2015	Baek SJ 2012	2012	Chong 2018	2018	Brook 2005	2005	Choo 2013	2013
Buzad 2013	2013	Baik 2008	2008	Corrado 2014	2014	Brook 2010	2010	Chung 2011	2011
Cadiere 2001	2001	Baker 2004	2004	Corrado 2015	2015	Buell 2004	2004	Clavijo 2013	2013
Calatayud 2012	2012	Barnajian 2014	2014	Corrado 2016	2016	Buffi 2019	2019	Coelho 2010	2010
Christoffersen 2015	2015	Bastawrous 2019	2019	Corrado 2018	2018	Busby 2008	2008	Coelho 2012	2012
Chuang 2015	2015	Bastawrous 2020	2020	Costantini 2017	2017	Cadiere 2001	2001	Deane 2008	2008
Chung 2015	2015	Bedirli 2016	2016	Deimling 2016	2016	Cannon 2005	2005	Di Pierro 2011	2011
Cinar 2018	2018	Beltzer 2019	2019	Deimling 2017	2017	Capitanio 2009	2009	Dotzauer 2021	2021
Cruz 2019	2019	Benz 2016	2016	Desille-Gbaguidi 2013	2013	Carrion 2016	2016	Draaisma 2006	2006
Dabbagh 2015	2015	Bertani 2011	2011	Ditto 2015	2015	Chang 2018	2018	Drouin 2009	2009
Donmez 2016	2016	Bhattu 2015	2015	Diver 2016	2016	Chen 2005	2005	Dubey 2012	2012
Draaisma 2006	2006	Bianchi 2010	2010	Diver 2017	2017	Choi 2014	2014	Elizondo 2020	2020
Dughayli 2018	2018	Bianchi 2021	2021	Doo 2019	2019	Chung 2009	2009	Elsamra 2014	2014
Ege 2017	2017	Bilgin 2019	2019	Dos Reis 2018	2018	Cohen 2015	2015	Fareed 2012	2012
Eid 2020	2020	Bilgin 2020	2020	Draaisma 2006	2006	De Groote 2019	2019	Ficarra 2007	2007
Ellatif 2013	2013	Biondi 2017	2017	Eoh 2021	2021	Deane 2008	2008	Ficarra 2009	2009
Eroler 2016	2016	Blumberg 2019	2019	Estape 2009	2009	Deng 2019	2019	Finkelstein 2010	2010
Escobar-Dominguez 2016	2016	Bo 2019	2019	Fagotti 2013	2013	Dols 2014	2014	Froehner 2012	2012
Farnsworth 2018	2018	Bokey 1996	1996	Fanfani 2016	2016	Draaisma 2006	2006	Fuschi 2021	2021
Farukhi 2017	2017	Braga 2007	2007	Frumovitz 2007	2007	El Fettouh 2002	2002	Gastecka 2018	2018
Funamizu 2019	2019	Byrn 2012	2012	Frumovitz 2020	2020	EL-Galley 2004	2004	Gershman 2018	2018
Giulianotti 2003	2003	Cadiere 2001	2001	Gallotta 2018	2018	Elizondo 2020	2020	Golomb 2021	2021
Gonzalez 2013	2013	Cardinali 2016	2016	Gortchev 2012	2012	Ellison 2012	2012	Hakimi 2009	2009
Grochola 2019	2019	Casillas 2013	2013	Gracia 2020	2020	Fairey 2012	2012	Hemal 2008	2008
Gustafson 2015	2015	Casillas 2014	2014	Green 2013	2013	Fang 2014	2014	Henry 2011	2011
Gustafson 2016	2016	Cassini 2018	2018	Gueli Alleti 2016	2016	Favaretto 2010	2010	Hou 2021	2021
Hagen 2017	2017	Cassini 2019	2019	Gungor 2017	2017	Garisto 2018	2018	Hoy 2015	2015
Hagen 2018	2018	Ceccarelli 2020	2020	Han 2019	2019	Gastecka 2018	2018	Hu 2006	2006
Hajong 2016	2016	Ceccarelli 2021	2021	He 2017	2017	Geffner 2011	2011	Hu 2009	2009
Han 2020	2020	Chaves 2011	2011	Heo 2018	2018	Gershbein 2002	2002	İnkaya 2019	2019
Hawasli 2016	2016	Chen 2017	2017	Ind 2019	2019	Gershman 2018	2018	Jeong 2017	2017
Heemskerk 2005	2005	Cho 2015	2015	Jackson 2004	2004	Gershman 2020	2020	Jiménez Rodriguez 2011	2011
Heemskerk 2014	2014	Chung 2007	2007	Jiménez Rodriguez 2011	2011	Gill 2000	2000	John 2009	2009
Higgins 2017	2017	Colombo 2016	2016	Johnson 2017	2017	Gjertsen 2006	2006	Johnson 2018	2018
Honaker 2015	2015	Conti 2021	2021	Jørgensen 2019	2019	Golombos 2017	2017	Joseph 2005	2005
Hu 2020	2020	Corbellini 2016	2016	Khan 2016	2016	Greco 2009	2009	Kasraeian 2011	2011
Igami 2015	2015	Cost 2004	2004	Kim 2019	2019	Gu 2017	2017	Khalifeh 2012	2012
Igami 2016	2016	Crolla 2018	2018	Kim J 2018	2018	Gu 2018	2018	Khan 2016	2016
Ito 2019	2019	Curet 2000	2000	Kim S 2019	2019	Hamidi 2009	2009	Koizumi 2018	2018
Jang 2019	2019	D'Annibale 2012	2012	Kim TH 2014	2014	Hanna 2011	2011	Koo 2014	2014
Jayaraman 2009	2009	D'Annibale 2013	2013	Ko 2008	2008	Hattori 2006	2006	Krambeck 2002	2002
Jeong 2018	2018	Darwich 2020	2020	Kong 2014	2014	Helmers 2016	2016	Kudsi 2016	2016
Jiménez Rodriguez 2011	2011	Davis 2014	2014	Kudsi 2016	2016	Hemal 2008	2008	Kukreja 2020	2020
Joong Choi 2015	2015	de'Angelis 2015	2015	Lambaudie 2010	2010	Hemal 2009	2009	Kural 2009	2009
Jorgensen 2014	2014	de'Angelis 2016	2016	Larose 2017	2017	Hennessey 2017	2017	Kurtz 2016	2016
Jung 2015	2015	de'Angelis 2018	2018	Laterza 2016	2016	Hirose 2018	2018	Kwon 2010	2010
Kalteis 2007	2007	Delaney 2003	2003	Lee 2011	2011	Hofker 2012	2012	Lee 2011	2011
Kamei 2015	2015	deSouza 2010	2010	Li 2007	2007	Hsueh 2006	2006	Lee 2019	2019
Kaminski 2014	2014	Deutsch 2012	2012	Lönnerfors 2014	2014	Hu 2009	2009	Lee D 2015	2015
Kane 2020	2020	Di Buono 2021	2021	Lönnerfors 2015	2015	Hu 2015	2015	Leslie 2014	2014
Khan 2016	2016	Dohrn 2021	2021	Lopez 2016	2016	Izumi 2013	2013	Lönnerfors 2015	2015
Khorgami 2014	2014	Dolejs 2016	2016	Luo 2018	2018	Jang 2014	2014	Maenpaa 2016	2016
Khorgami 2019	2019	Dolejs 2017	2017	Maenpaa 2016	2016	Janki 2017	2017	Magheli 2011	2011
Kim 2016	2016	Domajnko 2012	2012	Mäenpää 2016	2016	Jarret 2001	2001	Makela-Kaikkonen 2016	2016
Ko 2018	2018	Draaisma 2006	2006	Maggioni 2009	2009	Jeong 2017	2017	Martin 2016	2016
Komine 2015	2015	Du 2018	2018	Magrina 2008	2008	Jiménez Rodriguez 2011	2011	Martin Garzon 2016	2016
Kornprat 2006	2006	Elias 2019	2019	Makela-Kaikkonen 2016	2016	Kamihira 2009	2009	Martinez-Maestre 2014	2014
Kraft 2004	2004	Elliot 2015	2015	Malzoni 2009	2009	Kawauchi 2003	2003	Martinschek 2012	2012
Kubat 2016	2016	Elliott 2015	2015	Martinez 2013	2013	Khalifeh 2012	2012	Matei 2012	2012
Kudsi 2016	2016	Emilio 2013	2013	Martinez-Maestre 2014	2014	Khan 2016	2016	Menon 2002	2002
Kudsi 2017	2017	Enomoto 2020	2020	Melamed 2018	2018	Kido 2018	2018	Morino 2004	2004
Kumar 2007	2007	Erguner 2013	2013	Mendivil 2015	2015	Kim 2013	2013	Morino 2006	2006
Lee 2010	2010	Esch 2019	2019	Mendivil 2016	2016	Kim 2018	2018	Mourmouris 2019	2019
Lee 2020	2020	Esen 2018	2018	Moawad 2017	2017	Kim HS 2015	2015	Muller-Stich 2007	2007
Lee 2015	2015	Fabozzi 2010	2010	Morgan 2007	2007	Kim JK 2019	2019	Nakadi 2006	2006
Lee B 2019	2019	Feng 2012	2012	Morino 2004	2004	Kitamura 2014	2014	Nazemi 2006	2006
Lee EK 2017	2017	Feng 2014	2014	Morino 2006	2006	Kizilay 2019	2019	Nestler 2014	2014
Lee GI 2017	2017	Fernandez 2013	2013	Muller-Stich 2007	2007	Klingler 2003	2003	Nestler 2019	2019
Lee H 2017	2017	Feroci 2016	2016	Naik 2010	2010	Klop 2014	2014	Nething 2014	2014
Lee JH 2018	2018	Ferrara 2015	2015	Nakadi 2006	2006	Kocak 2007	2007	Ng 2010	2010
Lee SH 2015	2015	Ferrara 2016	2016	Nam 2012	2012	Kok 2006	2006	Niklas 2015	2015
Lee SR 2019	2019	Ferri 2021	2021	Nam EJ 2010	2010	Kudsi 2016	2016	Nio 2004	2004
Lescouflair 2014	2014	Fleming 2021	2021	Nam JK 2011	2011	Kukreja 2020	2020	Okegawa 2020	2020
Li 2017	2017	Fleshman 2015	2015	Narducci 2020	2020	Kural 2009	2009	Ou 2009	2009
Lim 2017	2017	Florent 2019	2019	Netter 2020	2020	Kurtz 2016	2016	Papachristos 2014	2014
Lirici 2011	2011	Foo 2015	2015	Nezhat 2008	2008	Lai 2010	2010	Papachristos 2015	2015
Lönnerfors 2015	2015	Frangaard 2018	2018	Ngan 2017	2017	Lee 2011	2011	Paraiso 2011	2011
Lurje 2015	2015	Fretland 2017	2017	Nie 2017	2017	Lee 2019	2019	Paraiso 2013	2013
Maenpaa 2016	2016	Fromisa 2021	2021	Nio 2004	2004	Lee H 2019	2019	Parekh 2013	2013
Main 2017	2017	Fujii 2014	2014	Obermair 2020	2020	Lenis 2017	2017	Parekh 2018	2018
Makela-Kaikkonen 2016	2016	Fulvio 2020	2020	Oyama 2018	2018	Li F 2017	2017	Park 2011	2011
Martinez-Maestre 2014	2014	Galata 2019	2019	Oyama 2019	2019	Lim 2013	2013	Park 2012	2012
Mattei 2018	2018	Gass 2022	2022	Paek 2016	2016	Liu 2012	2012	Park 2013	2013
Meillat 2015	2015	Gerbaud 2019	2019	Pahisa 2010	2010	Liu JY 2017	2017	Patel 2014	2014
Mirza 2017	2017	Gong 2012	2012	Paik 2019	2019	Liu W 2016	2016	Patriti 2009	2009
Mitko 2016	2016	Gorgun 2016	2016	Paraiso 2011	2011	Long 2012	2012	Pavan 2016	2016
Moore 2016	2016	Grass 2019	2019	Paraiso 2013	2013	Lönnerfors 2015	2015	Philippou 2012	2012
Morales-Conde 2016	2016	Guerrieri 2015	2015	Park 2012	2012	Lucas 2013	2013	Pierorazio 2011	2011
Morino 2004	2004	Guillou 2005	2005	Park 2013	2013	Luke 2018	2018	Pietrabissa 2016	2016
Morino 2006	2006	Haas 2021	2021	Park 2016	2016	Maenpaa 2016	2016	Ploussard 2012	2012
Muller-Stich 2007	2007	Hamzaoglu 2018	2018	Patriti 2009	2009	Makela-Kaikkonen 2016	2016	Ploussard 2014	2014
Nakadi 2006	2006	Hamzaoglu 2019	2019	Pellegrino 2017	2017	Manabe 2007	2007	Pokorny 2015	2015
Newman 2016	2016	Hamzaoglu 2020	2020	Pietrabissa 2016	2016	Martinez-Maestre 2014	2014	Porpiglia 2013	2013
Nio 2004	2004	Han 2014	2014	Porpiglia 2013	2013	Mateo 2003	2003	Porpiglia 2016	2016
Nolan 2018	2018	Hanna 2016	2016	Qin 2020	2020	Matsui 2002	2002	Porpiglia 2018	2018
Obuchi 2018	2018	Hannan 2021	2021	Rajadurai 2018	2018	Matsumoto 2015	2015	Probst 2016	2016
Ohira 2019	2019	Hasegawa 2003	2003	Ramirez 2018	2018	Melquist 2015	2015	Rassweiler 2003	2003
Omar 2017	2017	Haskins 2018	2018	Rashec 2013	2013	Menon 2002	2002	Rocco 2007	2007
Paraiso 2011	2011	He 2019	2019	Sanchez 2005	2005	Minnee 2008	2008	Roumeguere 2003	2003
Paraiso 2013	2013	Helbach 2019	2019	Sarlos 2010	2010	Miyazaki 2016	2016	Rozet 2007	2007
Park 2012	2012	Hellan 2009	2009	Sarlos 2012	2012	Mjogen 2010	2010	Sanchez 2005	2005
Patriti 2009	2009	Helvind 2013	2013	Sert 2007	2007	Morino 2004	2004	Sarlos 2012	2012
Pietrabissa 2015	2015	Henry 2013	2013	Sert 2011	2011	Morino 2006	2006	Schomburg 2014	2014
Pietrabissa 2016	2016	Hewett 2008	2008	Sert 2016	2016	Muller-Stich 2007	2007	Schroeck 2008	2008
Pokala 2019	2019	Hewitt 1998	1998	Shah 2017	2017	Muntener 2007	2007	Simone 2019	2019
Porpiglia 2013	2013	Hollandsworth 2020	2020	Sharma 2006	2006	Nakadi 2006	2006	Singh 2018	2018
Raboe 2019	2019	Huang 2015	2015	Sinha 2019	2019	Nakashima 2007	2007	Sirisopana 2019	2019
Rosales-Velderrain 2017	2017	Huang 2017	2017	Soliman 2011	2011	Nazemi 2006	2006	Sivaraman 2017	2017
Rosemurgy 2015	2015	Ielpo 2017	2017	Takmaz 2020	2020	Neill 2000	2000	Smith 2011	2011
Ross 2014	2014	Jayne 2017	2017	Taylor 2011	2011	Ng 2010	2010	Sorokin 2017	2017
Ruurda 2003	2003	Jayne 2019	2019	Tinelli 2011	2011	Nicholson 2010	2010	Sotelo 2008	2008
Ryu 2016	2016	Jesus 2016	2016	Toptas 2014	2014	Nicholson 2011	2011	Springe 2013	2013
Saad 2013	2013	Jiménez Rodriguez 2011	2011	Vizza 2015	2015	Niklas 2015	2015	Steinberg 2019	2019
Sanchez 2005	2005	Jiménez Rodriguez 2018	2018	Vizzielli 2016	2016	Nio 2004	2004	Stolzenburg 2014	2014
Sarlos 2012	2012	Jin 2011	2011	Wallin 2017	2017	Oh 2016	2016	Stolzenburg 2021	2021
Sato 2016	2016	Jung 2016	2016	Wang WH 2019	2019	Okegawa 2006	2006	Sugihara 2014	2014
Schertz 2019	2019	Kaiser 2004	2004	Wenzel 2020	2020	Okegawa 2012	2012	Sujenthiran 2019	2019
Seifarth 2017	2017	Kamali 2017	2017	Wijk 2016	2016	Oyen 2005	2005	Sutherland 2011	2011
Sharma 2017	2017	Kang 2010	2010	Xiao 2015	2015	Pai 2017	2017	Tozawa 2014	2014
Sinan 2012	2012	Kang 2013	2013	Xiao 2016	2016	Paraiso 2011	2011	Trabulsi 2010	2010
Smirnoff 2016	2016	Kang 2014	2014	Xu 2020	2020	Paraiso 2013	2013	Trabulsi 2011	2011
Spinoglio 2012	2012	Kang 2016	2016	Yim 2014	2014	Parekh 2013	2013	Trudeau 2014	2014
Strosberg 2016	2016	Karim 2016	2016	Yuan 2019	2019	Parekh 2018	2018	Uffort 2010	2010
Strosberg 2017	2017	Kelley 2018	2018	Zanagnolo 2016	2016	Park 2011	2011	Umari 2017	2017
Su 2016	2016	Khan 2011	2011			Park 2012	2012	Vora 2012	2012
Su 2017	2017	Khan 2016	2016			Patel 2015	2015	Voss 2013	2013
Sulu 2016	2016	Khan 2021	2021			Patriti 2009	2009	Wallerstedt 2015	2015
Sunamak 2018	2018	Khorgami 2019	2019			Pearce 2015	2015	Wang 2009	2009
Teoh 2017	2017	Kim 2021	2021			Percegona 2008	2008	Wang 2018	2018
Trujillo 2020	2020	Kim HJ 2018	2018			Peyronnet 2016	2016	Willis 2012	2012
Valcarenghi 2020	2020	Kim IY 2016	2016			Pierorazio 2011	2011	Yaxley 2016	2016
van der Linden 2016	2016	Kim J 2017	2017			Pietrabissa 2016	2016	Yu 2019	2019
Wakasugi 2017	2017	Kim JC 2016	2016			Ploussard 2012	2012	Yuh 2008	2008
Wren 2011	2011	Kim JC 2018	2018			Png 2013	2013	Yun 2019	2019
Ye 2015	2015	Kim JY 2012	2012			Porpiglia 2013	2013	Zhang 2017	2017
Zanghi 2015	2015	Kim MJ 2017	2017			Porpiglia 2016	2016	Zhang 2019	2019
Zhou 2006	2006	Kim MJ 2018	2018			Probst 2016	2016
		Kim YS 2016	2016			Pugh 2013	2013
		Kitano 2017	2017			Raheem 2016	2016
		Koc 2021	2021			Raman 2006	2006
		Kudsi 2016	2016			Rodriguez 2017	2017
		Kwak 2011	2011			Rose 2020	2020
		Kwon 2012	2012			Rouprêt 2007	2007
		Lacy 2002	2002			Ruiz-Deya 2001	2001
		Larach 2021	2021			Ruszat 2006	2006
		Law 2017	2017			Salazar 2005	2005
		Law 2019	2019			Sanchez 2005	2005
		Lee KH 2013	2013			Sarlos 2012	2012
		Lee KY 2018	2018			Schatteman 2006	2006
		Lee L 2018	2018			Schiavina 2016	2016
		Leung 1999	1999			Schomburg 2014	2014
		Leung 2004	2004			Seifman 2001	2001
		Lezoch 2002	2002			Shalhav 2000	2000
		Li 2011	2011			Shan 2015	2015
		Li 2012	2012			Shiong Lee 2006	2006
		Li 2018	2018			Simforoosh 2005	2005
		Li 2020	2020			Simforoosh 2012	2012
		Liang 2006	2006			Simhan 2012	2012
		Liang 2011	2011			Simone 2009	2009
		Liang 2014	2014			Singh 2018	2018
		Lightner 2019	2019			Smith 2011	2011
		Lim 2012	2012			Song 2015	2015
		Lim 2013	2013			Stewart 2011	2011
		Lim 2017	2017			Stifelman 2001	2001
		Liu 2010	2010			Sugihara 2014	2014
		Liu 2019	2019			Sundqvist 2004	2004
		Lohsiriwat 2007	2007			Tai 2009	2009
		Lönnerfors 2015	2015			Tamhankar 2018	2018
		Lujan 2009	2009			Taweemonkongsap 2008	2008
		Lujan 2013	2013			Terakawa 2008	2008
		Lujan 2017	2017			Tinay 2015	2015
		Lujan 2018	2018			Tomaszewski 2014	2014
		Maciel 2014	2014			Trudeau 2014	2014
		Maenpaa 2016	2016			Tsujihata 2005	2005
		Magistro 2013	2013			Ubrig 2018	2018
		Magistro 2021	2021			Ungbhakorn 2012	2012
		Magouliotis 2021	2021			Velidedeoglu 2002	2002
		Makela-Kaikkonen 2016	2016			Volpe 2014	2014
		Marchesi 2013	2013			Wadstrom 2003	2003
		Maria 2017	2017			Waldert 2008	2008
		Marino 2018	2018			Waller 2001	2001
		Mario 2015	2015			Waller 2002	2002
		Mark-Christensen 2016	2016			Walton 2010	2010
		Marks 2016	2016			Wang 2009	2009
		Martinek 2018	2018			Wang 2013	2013
		Martinez-Maestre 2014	2014			Wang 2015	2015
		Matsuda 2016	2016			Wang 2016	2016
		McLemore 2012	2012			White 2011	2011
		Megevand 2018	2018			Wolf 2001	2001
		Mégevand 2018	2018			Yadav 2016	2016
		Megevand 2019	2019			Yang 2014	2014
		Mégevand 2019	2019			Yang 2018	2018
		Melich 2014	2014			Yaxley 2016	2016
		Merola 2019	2019			Yu 2012	2012
		Merola 2020	2020			Yu 2018	2018
		Migliore 2020	2020			Yu 2019	2019
		Migliore 2021	2021			Zargar 2014	2014
		Miller 2012	2012			Zhang 2019	2019
		Miller 2016	2016			Zou 2014	2014
		Milone 2015	2015
		Milone 2020	2020
		Milsom 1998	1998
		Mlambo 2022	2022
		Moghadamyeghaneh 2016	2016
		Morelli 2015	2015
		Morelli 2016	2016
		Mori 2014	2014
		Morino 2004	2004
		Morino 2006	2006
		Morprugo 2013	2013
		Morpurgo 2013	2013
		Muller-Stich 2007	2007
		Nakadi 2006	2006
		Nakamura 2009	2009
		Neudecker 2009	2009
		Ng 2008	2008
		Ng 2012	2012
		Ng 2014	2014
		Ngu 2018	2018
		Nio 2004	2004
		Nolan 2018	2018
		Numata 2020	2020
		Ogilvie 2019	2019
		Olmi 2020	2020
		Ouyang 2019	2019
		Ozben 2018	2018
		Ozben 2019	2019
		Ozben 2020	2020
		Panteleimonitis 2018	2018
		Papaconstantinou 2011	2011
		Paraiso 2011	2011
		Paraiso 2013	2013
		Park 2010	2010
		Park 2011	2011
		Park 2012	2012
		Park 2015	2015
		Park 2019	2019
		Pas 2013	2013
		Pascual 2010	2010
		Patriti 2009	2009
		Pecorelli 2016	2016
		Pedraza 2011	2011
		Pedrazzani 2018	2018
		Perdawood 2016	2016
		Perdawood 2018	2018
		Petz 2017	2017
		Petz 2020	2020
		Pietrabissa 2016	2016
		Polat 2019	2019
		Popescu 2010	2010
		Porpiglia 2013	2013
		Ragupathi 2011	2011
		Ramachandra 2020	2020
		Ramji 2016	2016
		Raskin 2019	2019
		Rasulov 2016	2016
		Rawlings 2007	2007
		Rencuzogallari 2016	2016
		Rencuzogullari 2016	2016
		Roscio 2012	2012
		Rouanet 2018	2018
		Roviello 2015	2015
		Sanchez 2005	2005
		Sarlos 2012	2012
		Scatizzi 2010	2010
		Schietroma 2015	2015
		Schule am Esch 2019	2019
		Schwenk 1998	1998
		Scotton 2018	2018
		Serin 2015	2015
		Shapiro 2016	2016
		Shin 2012	2012
		Shiomi 2016a	2016a
		Siani 2017	2017
		Siddiqi 2020	2020
		Siddiqui 2021	2021
		Silva 2017	2017
		Silva-Velazco 2017	2017
		Solaini 2019	2019
		Sorgato 2021	2021
		Spinoglio 2008	2008
		Spinoglio 2018	2018
		Stefano 2014	2014
		Stevenson 2015	2015
		Subbiah 2015	2015
		Sugoor 2018	2018
		Sugoor 2019	2019
		Tagliabue 2020	2020
		Takahashi 2016	2016
		Takemasa 2014	2014
		Tam 2014	2014
		Tan 2009	2009
		Tanis 2012	2012
		Tei 2021	2021
		Tejedor 2019	2019
		Tong 2007	2007
		Trastulli 2013	2013
		Trastulli 2015	2015
		Trinh 2014	2014
		Tschann 2021	2021
		Valverde 2017	2017
		Veldkamp 2005	2005
		Velthuis 2014	2014
		Vergis 2015	2015
		Vlug 2011	2011
		Vogel 2011	2011
		Wang 2017	2017
		West 2014	2014
		Widmar 2016	2016
		Widmar 2017	2017
		Woeste 2004	2004
		Xia 2019	2019
		Xie 2017	2017
		Xu 2015	2015
		Xu 2021	2021
		Yamaguchi 2016	2016
		Yamamoto 2014	2014
		Yang 2018	2018
		Yang 2019	2019
		Yi 2019	2019
		Young 2014	2014
		Yozgatli 2019	2019
		Yozgatli 2019a	2019a
		Yozgatli 2019b	2019b
		Zedan 2021	2021
		Zhang 2017	2017
		Zheng 2005	2005
		Zhou 2004	2004
		Zhu 2017	2017
		Zimmern 2010	2010

## Sheet: Citation Matrix Cholecystectomy
Cholecystectomy
	Han et al. (2018)	Shenoy et al. (2021)	Sun et al. (2018a)	Sun et al. (2018b)	Wang et al. (2021)	Lin et al. (2023)	Roh et al. (2018)
Abel 2019		x
Aggarwal 2020		x
Ahn 2015					x
Aiono 2002							x
Albrecht 2017		x
Alhambra-Rodriguez de Guzman 2020					x
Altieri 2016		x
Anger 2014							x
Aprea 2016					x
Aragon 2014		x
Araki 2017					x
Arezzo 2017					x
Asimakopoulos 2011							x
Autin 2015		x
Ayabe 2018					x
Ayloo 2014	x
Baik 2008							x
Balachandran 2017		x	x		x
Beninato 2015					x
Bhattu 2015							x
Blachandran 2017	x
Blaphas 2017					x
Boer 2002	x
Breitenstein 2008	x
Broderick 2015					x
Buzad 2013	x	x		x
Cadiere 2001							x
Calatayud 2012		x
Christoffersen 2015					x
Chuang 2015					x
Chung 2015	x	x
Cinar 2018					x
Cruz 2019					x
Dabbagh 2015						x
Donmez 2016					x
Draaisma 2006							x
Dughayli 2018					x
Ege 2017					x
Eid 2020		x
Ellatif 2013						x
Eroler 2016						x
Escobar-Dominguez 2016					x
Farnsworth 2018		x
Farukhi 2017		x
Funamizu 2019					x
Giulianotti 2003	x
Gonzalez 2013	x	x		x
Grochola 2019		x			x	x
Gustafson 2015	x
Gustafson 2016		x		x	x
Hagen 2017	x	x	x
Hagen 2018		x			x
Hajong 2016					x
Han 2020					x
Hawasli 2016		x
Heemskerk 2005	x
Heemskerk 2014		x
Higgins 2017		x
Honaker 2015	x
Hu 2020					x
Igami 2015					x
Igami 2016					x
Ito 2019					x	x
Jang 2019		x			x
Jayaraman 2009	x
Jeong 2018					x
Jiménez Rodriguez 2011							x
Joong Choi 2015					x
Jorgensen 2014						x
Jung 2015					x
Kalteis 2007	x
Kamei 2015					x
Kaminski 2014		x
Kane 2020		x
Khan 2016							x
Khorgami 2014						x
Khorgami 2019		x
Kim 2016					x
Ko 2018					x
Komine 2015					x
Kornprat 2006	x
Kraft 2004	x
Kubat 2016					x
Kudsi 2016	x						x
Kudsi 2017		x	x		x	x
Kumar 2007						x
Lee 2010						x
Lee 2015					x
Lee 2020					x
Lee B 2019					x
Lee EK 2017	x		x
Lee GI 2017		x
Lee H 2017					x
Lee JH 2018		x
Lee SH 2015				x
Lee SR 2019		x			x
Lescouflair 2014		x
Li 2017	x	x	x
Lim 2017					x
Lirici 2011						x
Lönnerfors 2015							x
Lurje 2015					x	x
Maenpaa 2016							x
Main 2017		x
Makela-Kaikkonen 2016							x
Martinez-Maestre 2014							x
Mattei 2018					x
Meillat 2015					x
Mirza 2017						x
Mitko 2016		x
Moore 2016		x
Morales-Conde 2016					x
Morino 2004							x
Morino 2006							x
Muller-Stich 2007							x
Nakadi 2006							x
Newman 2016					x
Nio 2004	x						x
Nolan 2018					x
Obuchi 2018					x
Ohira 2019					x
Omar 2017					x
Paraiso 2011							x
Paraiso 2013							x
Park 2012							x
Patriti 2009							x
Pietrabissa 2015	x
Pietrabissa 2016		x	x		x	x	x
Pokala 2019		x
Porpiglia 2013							x
Raboe 2019					x
Rosales-Velderrain 2017					x
Rosemurgy 2015		x
Ross 2014		x
Ruurda 2003	x
Ryu 2016					x
Saad 2013						x
Sanchez 2005							x
Sarlos 2012							x
Sato 2016					x
Schertz 2019					x
Seifarth 2017					x
Sharma 2017						x
Sinan 2012						x
Smirnoff 2016					x
Spinoglio 2012	x	x		x
Strosberg 2016	x	x
Strosberg 2017		x
Su 2016	x			x
Su 2017		x			x
Sulu 2016					x
Sunamak 2018					x
Teoh 2017		x
Trujillo 2020					x
Valcarenghi 2020					x
van der Linden 2016					x
Wakasugi 2017					x
Wren 2011		x	x
Ye 2015					x
Zanghi 2015					x
Zhou 2006

## Sheet: Citation Matrix Colectomy
Colectomy
	Larkins et al. (2022)	Bianchi et al. (2022)	Sheng et al. (2018)	Giuliani et al. (2022)	Cuk et al. (2022)	Ravindra et al. (2022)	Cuk et al. (2023)	Flynn et al. (2022)	Gavriilidis et al. (2020)	Jones et al. (2018)	Petz et al. (2021)	Rausa et al. (2019)	Flynn et al. (2021)	Roh et al. (2018)	Solaini et al. (2022)	Genova et al. (2021)	Lauka et al. (2020)	Ma et al. (2019)	Rausa et al. (2019)	Solaini et al. (2018)	Tschann et al. (2022)	Waters et al. (2020)	Zhu et al. (2021)
Abdel-Halim 2010																			x
Adamina 2012							x
Ahmadi 2021																					x
Aiono 2002														x
Al Temimi 2019															x
Allemann 2015								x
Allemann 2016										x		x
Al-Temimi 2019	x			x
An 2018							x
Anania 2012																			x
Anger 2014														x
Anvari 2004		x
Araujo 2003			x
Aselmann 2018								x	x			x
Asimakopoulos 2011														x
Asklid 2019								x
Asoglu 2020								x
Aziz 2020							x
Bae 2014							x												x
Bae 2019											x
Baek 2011								x		x
Baek 2012										x
Baek 2013						x
Baek JH 2011									x
Baek SJ 2012									x
Baik 2008									x					x
Baker 2004																			x
Barnajian 2014								x	x	x
Bastawrous 2019				x
Bastawrous 2020	x
Bedirli 2016								x	x			x
Beltzer 2019	x			x											x
Benz 2016							x
Bertani 2011					x
Bhattu 2015														x
Bianchi 2010								x	x	x		x
Bianchi 2021							x				x
Bilgin 2019				x
Bilgin 2020	x														x
Biondi 2017																			x
Blumberg 2019																x	x
Bo 2019								x
Bokey 1996																			x
Braga 2007			x																x
Byrn 2012		x
Cadiere 2001														x
Cardinali 2016					x											x						x
Casillas 2013																			x
Casillas 2014															x	x	x	x		x	x
Cassini 2018				x
Cassini 2019	x														x
Ceccarelli 2020					x		x				x
Ceccarelli 2021						x															x
Chaves 2011																			x
Chen 2017							x
Cho 2015						x		x	x	x		x
Chung 2007																			x
Colombo 2016										x		x
Conti 2021							x
Corbellini 2016								x
Cost 2004			x
Crolla 2018								x	x
Curet 2000			x
D'Annibale 2012		x
D'Annibale 2013								x	x	x		x
Darwich 2020	x
Davis 2014																x	x			x
de'Angelis 2015					x														x
de'Angelis 2016					x											x	x	x		x	x	x
de'Angelis 2018						x
Delaney 2003																x
deSouza 2010																x	x	x	x	x	x
Deutsch 2012																x	x	x	x	x	x
Di Buono 2021							x
Dohrn 2021																					x
Dolejs 2016																				x
Dolejs 2017																x	x	x			x
Domajnko 2012		x											x
Draaisma 2006														x
Du 2018							x
Elias 2019		x											x
Elliot 2015				x
Elliott 2015	x
Emilio 2013																							x
Enomoto 2020							x
Erguner 2013						x		x											x
Esch 2019											x
Esen 2018								x	x			x
Fabozzi 2010																			x
Feng 2012							x
Feng 2014							x
Fernandez 2013								x
Feroci 2016								x	x	x		x
Ferrara 2015																x
Ferrara 2016						x											x	x				x
Ferri 2021																					x
Fleming 2021						x
Fleshman 2015			x
Florent 2019																							x
Foo 2015										x
Frangaard 2018					x
Fretland 2017			x
Fromisa 2021	x
Fujii 2014			x
Fulvio 2020																							x
Galata 2019						x		x
Gass 2022															x
Gerbaud 2019																x	x				x
Gong 2012			x
Gorgun 2016										x
Grass 2019	x
Guerrieri 2015					x	x										x	x	x				x
Guillou 2005			x
Haas 2021	x
Hamzaoglu 2018							x
Hamzaoglu 2019		x
Hamzaoglu 2020													x
Han 2014																			x
Hanna 2016																			x
Hannan 2021																					x
Hasegawa 2003			x
Haskins 2018					x											x	x				x	x
He 2019							x
Helbach 2019												x
Hellan 2009																			x
Helvind 2013		x			x
Henry 2013																							x
Hewett 2008			x
Hewitt 1998			x
Hollandsworth 2020		x
Huang 2015							x
Huang 2017						x		x
Ielpo 2017						x		x		x
Jayne 2017						x			x	x
Jayne 2019								x
Jesus 2016								x		x
Jiménez Rodriguez 2011			x											x
Jiménez Rodriguez 2018		x
Jin 2011																							x
Jung 2016					x
Kaiser 2004			x
Kamali 2017								x
Kang 2010			x
Kang 2013								x	x	x
Kang 2014							x
Kang 2016					x											x	x	x	x	x	x	x
Karim 2016										x
Kelley 2018																x
Khan 2011																			x
Khan 2016														x
Khan 2021							x
Khorgami 2019																x	x
Kim 2021		x
Kim HJ 2018												x
Kim IY 2016							x
Kim J 2017								x
Kim JC 2016								x		x
Kim JC 2018					x	x									x
Kim JY 2012									x
Kim MJ 2017			x
Kim MJ 2018								x	x
Kim YS 2016								x		x		x
Kitano 2017			x
Koc 2021							x
Kudsi 2016														x
Kwak 2011										x
Kwon 2012																			x
Lacy 2002			x
Larach 2021							x				x
Law 2017								x	x
Law 2019												x
Lee KH 2013																			x
Lee KY 2018												x
Lee L 2018												x
Leung 1999																			x
Leung 2004			x
Lezoch 2002																			x
Li 2011			x
Li 2012																			x
Li 2018							x
Li 2020							x
Liang 2006			x
Liang 2011			x
Liang 2014							x
Lightner 2019		x											x
Lim 2012					x
Lim 2013						x									x
Lim 2017								x	x	x
Liu 2010			x
Liu 2019								x
Lohsiriwat 2007																			x
Lönnerfors 2015														x
Lujan 2009			x
Lujan 2013																x	x	x
Lujan 2017																				x
Lujan 2018																x	x		x		x		x
Maciel 2014	x			x											x
Maenpaa 2016														x
Magistro 2013																			x
Magistro 2021							x
Magouliotis 2021							x
Makela-Kaikkonen 2016														x
Marchesi 2013																			x
Maria 2017																							x
Marino 2018		x											x
Mario 2015																							x
Mark-Christensen 2016		x											x
Marks 2016												x
Martinek 2018																			x
Martinez-Maestre 2014														x
Matsuda 2016							x
McLemore 2012		x
Megevand 2018																						x
Mégevand 2018					x
Megevand 2019								x									x
Mégevand 2019																x					x
Melich 2014							x
Merola 2019					x											x	x
Merola 2020																					x
Migliore 2020																x
Migliore 2021																					x
Miller 2012		x											x
Miller 2016																x
Milone 2015																			x
Milone 2020																x
Milsom 1998			x
Mlambo 2022															x
Moghadamyeghaneh 2016		x
Morelli 2015		x											x
Morelli 2016						x		x
Mori 2014							x
Morino 2004														x
Morino 2006														x
Morprugo 2013																x
Morpurgo 2013					x													x	x			x
Muller-Stich 2007														x
Nakadi 2006														x
Nakamura 2009																			x
Neudecker 2009			x
Ng 2008			x
Ng 2012																			x
Ng 2014			x
Ngu 2018					x						x					x	x				x	x
Nio 2004														x
Nolan 2018																x	x
Numata 2020								x
Ogilvie 2019	x			x
Olmi 2020							x
Ouyang 2019							x
Ozben 2018							x
Ozben 2019		x
Ozben 2020					x
Panteleimonitis 2018								x
Papaconstantinou 2011																			x
Paraiso 2011														x
Paraiso 2013														x
Park 2010												x
Park 2011									x	x
Park 2012			x		x									x				x	x	x		x	x
Park 2015								x
Park 2019						x										x	x				x
Pas 2013			x
Pascual 2010			x
Patriti 2009								x	x					x
Pecorelli 2016			x
Pedraza 2011		x
Pedrazzani 2018							x
Perdawood 2016												x
Perdawood 2018												x
Petz 2017											x
Petz 2020							x				x
Pietrabissa 2016														x
Polat 2019					x
Popescu 2010								x		x
Porpiglia 2013														x
Ragupathi 2011	x
Ramachandra 2020							x				x
Ramji 2016								x	x	x
Raskin 2019	x
Rasulov 2016												x
Rawlings 2007																x	x	x	x	x	x
Rencuzogallari 2016													x
Rencuzogullari 2016		x
Roscio 2012																			x
Rouanet 2018								x	x
Roviello 2015		x
Sanchez 2005														x
Sarlos 2012														x
Scatizzi 2010																			x
Schietroma 2015			x
Schule am Esch 2019							x
Schwenk 1998			x
Scotton 2018					x											x						x
Serin 2015								x		x		x
Shapiro 2016																			x
Shin 2012																x			x
Shiomi 2016a									x
Siani 2017							x
Siddiqi 2020							x
Siddiqui 2021											x
Silva 2017								x
Silva-Velazco 2017										x
Solaini 2019																x	x
Sorgato 2021																					x
Spinoglio 2008		x
Spinoglio 2018					x		x				x					x	x				x	x
Stefano 2014																							x
Stevenson 2015			x
Subbiah 2015							x
Sugoor 2018									x
Sugoor 2019								x
Tagliabue 2020																					x
Takahashi 2016							x
Takemasa 2014							x
Tam 2014								x
Tan 2009																			x
Tanis 2012																			x
Tei 2021							x
Tejedor 2019								x
Tong 2007																			x
Trastulli 2013											x
Trastulli 2015																x	x	x	x	x	x	x
Trinh 2014																x
Tschann 2021							x
Valverde 2017								x	x	x		x
Veldkamp 2005			x
Velthuis 2014												x
Vergis 2015																			x
Vlug 2011			x
Vogel 2011																			x
Wang 2017							x	x
West 2014							x
Widmar 2016																x	x				x	x
Widmar 2017					x											x	x
Woeste 2004				x
Xia 2019	x
Xie 2017							x
Xu 2015			x
Xu 2021							x								x
Yamaguchi 2016								x		x
Yamamoto 2014			x
Yang 2018								x
Yang 2019							x				x
Yi 2019							x
Young 2014								x
Yozgatli 2019											x					x	x				x	x
Yozgatli 2019a					x		x
Yozgatli 2019b							x
Zedan 2021							x
Zhang 2017										x
Zheng 2005																			x
Zhou 2004			x
Zhu 2017							x
Zimmern 2010		x

## Sheet: Citation Matrix Hysterectomy
Hysterectomy
	Alshowaikh et al. (2021)	Prodromidou et al. (2020)	Kampers et al. (2022)	Marchand et al. (2021)	Zhang et al. (2019)	Guo et al. (2023)	Jin et al. (2018)	Hwang et al. (2020)	Lawrie et al. (2019)	Roh et al. (2018)
Aiko 2020	x
Aiono 2002										x
Akdemir 2015		x
Alfonzo 2019						x
Anger 2014									x	x
Asciutto 2015					x
Asimakopoulos 2011										x
Baik 2008										x
Barrie 2016	x
Beck 2018	x
Bert 2016					x
Bhattu 2015										x
Bogani 2014						x
Bogani 2020			x
Borahay 2018	x
Brunes 2021	x
Cadiere 2001										x
Campos 2013			x				x
Cela 2018		x
Chen 2014							x	x
Chen 2019	x
Chen B 2020						x
Chen L 2019						x
Choi 2012						x
Chong 2018								x
Corrado 2014			x
Corrado 2015					x
Corrado 2016								x
Corrado 2018								x
Costantini 2017									x
Deimling 2016	x			x
Deimling 2017									x
Desille-Gbaguidi 2013								x
Ditto 2015						x	x
Diver 2016			x
Diver 2017					x
Doo 2019			x			x
Dos Reis 2018			x
Draaisma 2006										x
Eoh 2021	x
Estape 2009							x	x
Fagotti 2013		x
Fanfani 2016	x
Frumovitz 2007							x
Frumovitz 2020			x
Gallotta 2018						x		x
Gortchev 2012								x
Gracia 2020	x
Green 2013									x
Gueli Alleti 2016	x
Gungor 2017	x	x
Han 2019	x
He 2017						x
Heo 2018								x
Ind 2019								x
Jackson 2004						x
Jiménez Rodriguez 2011										x
Johnson 2017	x
Jørgensen 2019	x
Khan 2016										x
Kim 2019						x
Kim J 2018			x
Kim S 2019			x
Kim TH 2014					x			x
Ko 2008							x
Kong 2014			x				x
Kudsi 2016										x
Lambaudie 2010					x			x
Larose 2017									x
Laterza 2016			x
Lee 2011						x
Li 2007			x				x
Lönnerfors 2014				x					x
Lönnerfors 2015										x
Lopez 2016		x
Luo 2018								x
Maenpaa 2016										x
Mäenpää 2016	x			x					x
Maggioni 2009							x
Magrina 2008								x
Makela-Kaikkonen 2016										x
Malzoni 2009			x				x
Martinez 2013				x
Martinez-Maestre 2014										x
Melamed 2018			x
Mendivil 2015			x
Mendivil 2016					x	x		x
Moawad 2017	x
Morgan 2007						x
Morino 2004										x
Morino 2006										x
Muller-Stich 2007										x
Naik 2010			x
Nakadi 2006										x
Nam 2012						x	x
Nam EJ 2010			x
Nam JK 2011			x
Narducci 2020				x
Netter 2020	x
Nezhat 2008								x
Ngan 2017	x
Nie 2017	x							x
Nio 2004										x
Obermair 2020			x
Oyama 2018	x
Oyama 2019								x
Paek 2016		x
Pahisa 2010						x
Paik 2019			x			x
Paraiso 2011									x	x
Paraiso 2013									x	x
Park 2012										x
Park 2013							x
Park 2016			x
Patriti 2009										x
Pellegrino 2017	x				x	x		x
Pietrabissa 2016										x
Porpiglia 2013										x
Qin 2020						x
Rajadurai 2018	x
Ramirez 2018			x
Rashec 2013									x
Sanchez 2005										x
Sarlos 2010									x
Sarlos 2012										x
Sert 2007			x
Sert 2011				x
Sert 2016			x			x
Shah 2017						x
Sharma 2006						x
Sinha 2019	x
Soliman 2011					x		x	x
Takmaz 2020	x
Taylor 2011							x
Tinelli 2011			x		x		x	x
Toptas 2014						x	x
Vizza 2015								x
Vizzielli 2016			x		x
Wallin 2017						x
Wang WH 2019						x
Wenzel 2020						x
Wijk 2016									x
Xiao 2015						x
Xiao 2016			x
Xu 2020						x
Yim 2014					x		x	x
Yuan 2019						x
Zanagnolo 2016					x	x

## Sheet: Citation Matrix Nephrectomy
Nephrectomy
	Roh et al. (2018)	Zahid et al. (2022)	Veccia et al. (2020)	Li et al. (2020)	Crocerossa et al. (2021)	Wang et al. (2019)	Sharma et al. (2022)	Tang et al. (2020)	Xiao et al. (2020)
Abe 2018			x
Abedali 2020							x
Aboumohamed 2015			x
Aiono 2002	x
Ambani 2013			x
Anele 2019				x	x
Anger 2014	x
Arghami 2015		x
Ariane 2011			x
Asimakopoulos 2011	x	x
Bahattu 2015						x
Baik 2008	x
Bargman 2006									x
Bariol 2004			x
Beksac 2019							x
Benway 2009		x
Berger 2008			x
Bhattu 2015	x								x
Blackmur 2014			x
Bochner 2015		x
Bolenz 2009		x
Bora 2017							x
Branco 2008									x
Brandao 2014		x
Brook 2005									x
Brook 2010									x
Buell 2004									x
Buffi 2019							x
Busby 2008			x
Cadiere 2001	x
Cannon 2005			x
Capitanio 2009			x
Carrion 2016			x
Chang 2018								x
Chen 2005			x
Choi 2014									x
Chung 2009			x
Cohen 2015						x			x
De Groote 2019			x
Deane 2008		x
Deng 2019							x
Dols 2014									x
Draaisma 2006	x
El Fettouh 2002			x
EL-Galley 2004									x
Elizondo 2020		x
Ellison 2012							x
Fairey 2012			x
Fang 2014			x
Favaretto 2010			x
Garisto 2018							x
Gastecka 2018		x
Geffner 2011						x			x
Gershbein 2002									x
Gershman 2018		x
Gershman 2020					x
Gill 2000			x
Gjertsen 2006									x
Golombos 2017				x	x
Greco 2009			x						x
Gu 2017					x
Gu 2018								x
Hamidi 2009									x
Hanna 2011			x
Hattori 2006			x
Helmers 2016				x	x
Hemal 2008		x	x
Hemal 2009				x	x
Hennessey 2017							x
Hirose 2018									x
Hofker 2012									x
Hsueh 2006			x
Hu 2009		x
Hu 2015			x
Izumi 2013			x
Jang 2014							x
Janki 2017						x			x
Jarret 2001			x
Jeong 2017		x			x
Jiménez Rodriguez 2011	x
Kamihira 2009			x
Kawauchi 2003			x
Khalifeh 2012		x
Khan 2016	x	x
Kido 2018			x
Kim 2013			x
Kim 2018			x
Kim HS 2015			x
Kim JK 2019							x
Kitamura 2014			x
Kizilay 2019								x
Klingler 2003			x
Klop 2014									x
Kocak 2007									x
Kok 2006									x
Kudsi 2016	x
Kukreja 2020		x
Kural 2009		x
Kurtz 2016		x
Lai 2010									x
Lee 2011		x
Lee 2019		x
Lee H 2019			x
Lenis 2017			x
Li F 2017				x
Lim 2013			x
Liu 2012						x			x
Liu JY 2017			x
Liu W 2016			x
Long 2012							x
Lönnerfors 2015	x
Lucas 2013									x
Luke 2018						x			x
Maenpaa 2016	x
Makela-Kaikkonen 2016	x
Manabe 2007			x
Martinez-Maestre 2014	x
Mateo 2003									x
Matsui 2002			x
Matsumoto 2015			x
Melquist 2015			x
Menon 2002		x
Minnee 2008									x
Miyazaki 2016			x
Mjogen 2010									x
Morino 2004	x
Morino 2006	x
Muller-Stich 2007	x
Muntener 2007			x
Nakadi 2006	x
Nakashima 2007			x
Nazemi 2006		x		x	x
Neill 2000			x
Ng 2010		x
Nicholson 2010									x
Nicholson 2011									x
Niklas 2015		x
Nio 2004	x
Oh 2016								x
Okegawa 2006			x
Okegawa 2012			x
Oyen 2005									x
Pai 2017			x
Paraiso 2011	x
Paraiso 2013	x
Parekh 2013		x
Parekh 2018		x
Park 2011		x
Park 2012	x
Patel 2015			x
Patriti 2009	x
Pearce 2015			x
Percegona 2008									x
Peyronnet 2016								x
Pierorazio 2011		x
Pietrabissa 2016	x
Ploussard 2012		x
Png 2013							x
Porpiglia 2013	x
Porpiglia 2016		x
Probst 2016		x
Pugh 2013			x
Raheem 2016							x
Raman 2006			x
Rodriguez 2017			x
Rose 2020					x
Rouprêt 2007			x
Ruiz-Deya 2001									x
Ruszat 2006									x
Salazar 2005									x
Sanchez 2005	x
Sarlos 2012	x
Schatteman 2006			x
Schiavina 2016							x
Schomburg 2014		x
Seifman 2001			x
Shalhav 2000			x
Shan 2015			x
Shiong Lee 2006			x
Simforoosh 2005									x
Simforoosh 2012									x
Simhan 2012							x
Simone 2009			x
Singh 2018		x
Smith 2011		x
Song 2015			x
Stewart 2011			x
Stifelman 2001			x						x
Sugihara 2014			x
Sundqvist 2004									x
Tai 2009			x
Tamhankar 2018			x
Taweemonkongsap 2008			x
Terakawa 2008			x
Tinay 2015			x
Tomaszewski 2014							x
Trudeau 2014		x	x
Tsujihata 2005			x
Ubrig 2018							x
Ungbhakorn 2012									x
Velidedeoglu 2002									x
Volpe 2014							x
Wadstrom 2003									x
Waldert 2008			x
Waller 2001									x
Waller 2002									x
Walton 2010			x
Wang 2009		x
Wang 2013			x
Wang 2015							x	x
Wang 2016							x
White 2011				x	x		x
Wolf 2001									x
Yadav 2016									x
Yang 2014			x		x
Yang 2018						x			x
Yaxley 2016		x
Yu 2012					x
Yu 2018								x
Yu 2019		x
Zargar 2014			x				x
Zhang 2019		x
Zou 2014			x

## Sheet: Citation Matrix Prostatectomy
Prostatectomy
	Roh et al. (2018)	Du et al. (2018)	Carbonara et al. (2021)	Wang et al. (2019)	Pandolfo et al. (2022)	Kordan et al. (2020)	Li et al. (2022)	Zahid et al. (2022)
Aiono 2002	x
Akand 2015		x
Amenta 2022					x		x
Anger 2014	x
Arghami 2015								x
Asimakopoulos 2011	x		x					x
Autorino 2015					x	x	x
Baik 2008	x
Ball 2006			x
Banapour 2014						x
Barocas 2010		x
Barry 2012		x
Benway 2009								x
Bhanvadia 2021					x
Bhattu 2015	x
Bochner 2015								x
Bolenz 2009								x
Brandao 2014								x
Cacciamani 2018						x
Cadiere 2001	x
Castillo 2016						x
Chan 2017			x
Chavali 2018						x
Cho JM 2021					x
Choo 2013		x
Chung 2011		x
Clavijo 2013						x
Coelho 2010				x
Coelho 2012						x
Deane 2008								x
Di Pierro 2011		x
Dotzauer 2021					x
Draaisma 2006	x
Drouin 2009			x	x
Dubey 2012						x
Elizondo 2020								x
Elsamra 2014						x
Fareed 2012						x
Ficarra 2007				x
Ficarra 2009		x
Finkelstein 2010				x
Froehner 2012		x
Fuschi 2021					x		x
Gastecka 2018								x
Gershman 2018								x
Golomb 2021					x
Hakimi 2009		x	x	x
Hemal 2008								x
Henry 2011		x
Hou 2021					x
Hoy 2015						x
Hu 2006			x	x
Hu 2009								x
İnkaya 2019			x
Jeong 2017								x
Jiménez Rodriguez 2011	x
John 2009						x
Johnson 2018			x			x
Joseph 2005			x	x
Kasraeian 2011			x
Khalifeh 2012								x
Khan 2016	x							x
Koizumi 2018			x
Koo 2014		x
Krambeck 2002		x
Kudsi 2016	x
Kukreja 2020								x
Kural 2009								x
Kurtz 2016								x
Kwon 2010		x
Lee 2011								x
Lee 2019								x
Lee D 2015		x
Leslie 2014						x
Lönnerfors 2015	x
Maenpaa 2016	x
Magheli 2011			x	x
Makela-Kaikkonen 2016	x
Martin 2016						x	x
Martin Garzon 2016					x
Martinez-Maestre 2014	x
Martinschek 2012		x
Matei 2012						x
Menon 2002			x	x				x
Morino 2004	x
Morino 2006	x
Mourmouris 2019					x	x
Muller-Stich 2007	x
Nakadi 2006	x
Nazemi 2006								x
Nestler 2014						x
Nestler 2019					x	x
Nething 2014						x
Ng 2010								x
Niklas 2015								x
Nio 2004	x
Okegawa 2020			x
Ou 2009		x
Papachristos 2014		x
Papachristos 2015			x	x
Paraiso 2011	x
Paraiso 2013	x
Parekh 2013								x
Parekh 2018								x
Park 2011		x						x
Park 2012	x
Park 2013			x	x
Patel 2014						x
Patriti 2009	x
Pavan 2016					x	x	x
Philippou 2012		x
Pierorazio 2011								x
Pietrabissa 2016	x
Ploussard 2012								x
Ploussard 2014		x	x
Pokorny 2015						x
Porpiglia 2013	x			x
Porpiglia 2016								x
Porpiglia 2018			x
Probst 2016								x
Rassweiler 2003		x
Rocco 2007		x
Roumeguere 2003		x
Rozet 2007		x	x	x
Sanchez 2005	x
Sarlos 2012	x
Schomburg 2014								x
Schroeck 2008		x
Simone 2019						x
Singh 2018								x
Sirisopana 2019			x
Sivaraman 2017			x
Smith 2011								x
Sorokin 2017					x	x
Sotelo 2008						x
Springe 2013		x
Steinberg 2019						x
Stolzenburg 2014						x
Stolzenburg 2021			x
Sugihara 2014		x
Sujenthiran 2019			x
Sutherland 2011						x
Tozawa 2014		x	x	x
Trabulsi 2010		x
Trabulsi 2011				x
Trudeau 2014								x
Uffort 2010						x
Umari 2017					x	x
Vora 2012						x
Voss 2013		x
Wallerstedt 2015		x
Wang 2009								x
Wang 2018						x
Willis 2012			x	x
Yaxley 2016		x						x
Yu 2019								x
Yuh 2008						x
Yun 2019			x
Zhang 2017					x	x
Zhang 2019								x
