# Supplementary material for: A <span aria-describedby="tippy-18">Comparison of Clinical Outcomes of Robot-Assisted and Conventional Laparoscopic Surgery
Source: Preprints.org preprint supplement (doi:10.20944/preprints202312.0246.v1), 2023-12-05
Supplement: Supplementary file 3 [file Table study characteristics.xlsx]

## Sheet: All procedures
Data Extraction: Study characteristics
Author	Year of publication	Group	Objectives	Systematic review or (network) Meta-analysis	Specific surgical parameters	No. Studies / Participants	RALS participants (%)	CLS patients (%)	Country of participants	Mean Age of participants (Year)	Indication for surgery	Interventions	Databases searched (n)	Date range of included studies	Included study type	Country of origin of included studies	Method used to asses risk of bias	Method of analysis (RE/FE/CMH)	Relevant clinical outcomes reported
Han et al.	2018	cholecystectomy	Evaluate safety and efficacy of RALS compared with CLS for benign gallbladder disease	Meta-analysis	all	26/4004	1833 (46%)	2171 (54%)	Switzerland, Taiwan, USA	N/A	benign gallbladder disease	cholecystectomy	3	up to December 2017	RCTs and NRCSs	N/A	RCTs: Cochrane Risk of Bias Tool (RoB2) NRCSs: Newcastle-Ottawa Scale	RE	OR time, intraoperative complications, blood loss, conversion rates, postoperative complications, length of hospital stay, readmission rate, rate of incisional hernia, hospitalization costs
Shenoy et al.	2021	cholecystectomy	compare the clinical effectiveness of RALS versus CLS for benign gallbladder disease	Systematic Review	multiple subgroups	44/645025	7572 (1,2%)	637453 (98,8%)	Worldwide	N/A	benign gallbladder disease	cholecystectomy	3	January 2010 to March 2020	RCTs, observational studies	Worldwide	RCTs: Cochrane Risk of Bias Tool (RoB2) Observational studies: ROBINS-I	-	OR time, intraoperative complications, conversion rates, length of stay, surgical site infection, readmission rate, pain, rate of incisional hernia.
Sun et al.	2018a	cholecystectomy	evaluate the safety and feasibility of single-site RALS compared to multi-port CLS for cholecystectomy	Meta-analysis	SR vs ML	7/1657	775 (47%)	882 (53%)	N/A	51.6	Multiple	cholecystectomy	4	2011 to 2017	RCTs, comparative studies	N/A	N/A	RE for heterogeneity, FE for homogeneity	operative time, intraoperative complications (bleeding), postoperative complications (bile leakage, wound infection, and incisional hernia), conversion rate, hospital stay, and total cost
Sun et al.	2018b	cholecystectomy	evaluate outcomes, safety and feasibility of single site RALS compared to single site CLS for cholecystectomy	Meta-analysis	SR vs SL	6/633	305 (48%)	328 (52%)	N/A	47.8	Multiple	cholecystectomy	4	2011 to 2017	RCTs, comparative studies	N/A	NRCSs: Newcastle-Ottawa scale	RE for heterogeneity, FE for homogeneity	operative time, intraoperative complications, postoperative complications, readmissions rate, hospital stay, and total cost.
Wang et al.	2021	cholecystectomy	update the summarization of the feasibility and safety of single site RALS and single site CLS for cholecystectomy	Meta-analysis	SR vs SL	70/7828	1544 (20%)	6234 (80%)	N/A	N/A	benign gallbladder disease	cholecystectomy	1	2015 to 2020	All study types	N/A	N/A	FE	rate of incisional hernia
Lin et al.	2023	cholecystectomy	comprehensive comparison to explore which surgical options for cholecystectomy could benefit patients with benign gallbladder diseases.	Network Meta-analysis	multiple subgroups	17/1627	143 (9%)	1484 (91%)	N/A	N/A	benign gallbladder disease	cholecystectomy	3	up to April 2022	RCTs	N/A	RCTs: Cochrane Risk of Bias Tool (RoB2)	RE	operative time, hospital stay, postoperative pain, postoperative complications
Larkins et al.	2022	colectomy	evaluate the role of robotic surgery compared to laparoscopic surgery in diverticular resection	Meta-analysis	-	15/21258	3711 (17%)	16498 (78%)	N/A	N/A	diverticular resection	colectomy (all)	3	up to 8 June 2021	Cohort studies, case studies	N/A	Newcastle-Ottawa scale	RE	operating time, length of stay, overall complication rate, additional organ types resected, stoma formation and rate of conversion to an open procedure.
Bianchi et al.	2022	colectomy	provide a systematic review and meta-analysis of the literature investigating the outcomes of robotic proctectomy and (sub)total colectomy compared to laparoscopy	Meta-analysis	-	23/28315	736 (3%)	9904 (35%)	N/A	N/A	multiquadrant colorectal surgeries	robotic total proctocolectomy (TPC), total colectomy (TC), subtotal colectomy (STC), or completion proctectomy (CP)	3	2004 to 2022	comparative studies and case series.	N/A	Case-control and cohort studies: Newcastle–Ottawa Scale Case series: GRADE system	RE	operative time, blood loss, conversion to laparoscopy or open surgery, postoperative outcomes (postoperative complications, 90-days morbidity and mortality, hospital stay, rate of stoma closure), and assessment of fecal incontinence (Wexner score)
Sheng et al.	2018	colectomy	find the better treatment for colorectal cancer by comparing RALS, CLS and open surgery for colorectal surgery	Network Meta-analysis	-	40/12825	129 (1%)	6749 (52%)	Worldwide	N/A	colorectal cancer	colectomy (all)	3	1998 to 2017	RCTs	Worldwide	RCTs: Cochrane Risk of Bias Tool (RoB2)	RE	operation time, estimated blood loss, length of hospital stay and complication, mortality, anastomotic leakage, wound infection, bleeding, and ileus
Giuliani et al.	2022	colectomy	Does RALS colectomy present advantages/better outcomes than CLS for left-sided diverticular disease	Meta-analysis	-	9/4177	2174 (52%)	2003 (48%)	N/A	RALS: 55.2-68.7; CLS: 52.7 -67.4	left sided diverticular disease	Sigmoidectomy, left hemicolectomy, and anterior resection	3	2002 to 2018	all comparative studies	USA, Germany, Italy, Turkey	NRCSs: ROBINS-I	FE and RE	conversion rate, primary anastomosis, operation time, intraoperative complications, postoperative complications, major postoperative complications, reoperation rate, and length of stay
Cuk et al.	2022	colectomy	evaluate the short-term outcomes of RALS for colon cancer compared to CLS	Meta-analysis	-	SR: 24/14093 MA: 20/13799	SR: 1862 (13%) MA: 1740 (13%)	SR: 12231 (87%) MA: 12059 (87%)	Worldwide	RALS: 66.87; CLS: 67.69	colon cancer	colorectal cancer surgery + additional subgroup: right hemicolectomy	3	January 1 2005 to October 2 2020	RCTs, observational studies	Worldwide	Cochrane Risk of Bias Tool (RoB2) and ROBINS-I	RE for high heterogeneity, FE for low heterogeneity	anastomotic leakage rate, conversion to open surgery, operative time, length of hospital stay, complication rates, time to first flatus and oral diet, intraoperative blood loss, rate of postoperative bleeding, surgical site infection, intra-abdominal abscess formation, postoperative bowel obstruction, the total amount of harvested lymph nodes, 30 days mortality, Clavien–Dindo classification I–V, …
Ravindra et al.	2022	colectomy	compare the postoperative outcomes of RALS and CLS for colorectal resection for colorectal malignancy	Meta-analysis	-	16/2318	1271 (45%)	1047 (55%)	Worldwide	N/A	colorectal cancer	colorectal resection	4	2012 to April 10, 2022	RCTs, NRCSs, observational studies	South Korea, Italy, France, Germany, Ireland, Spain, Taiwan, Turkey	RCTs: Cochrane Risk of Bias Tool (RoB2) NRCSs: Newcastle-Ottawa Scale	RE for high heterogeneity, FE for low heterogeneity	recovery post-surgery, length of hospital stay, time to pass flatus, time to consume a soft diet, anastomotic leakage, intra-abdominal abscess, mechanical obstruction, postoperative ileus, wound infections, readmission rate, postoperative mortality at 30 days, sexual dysfunction, and wound dehiscence or incisional hernia.
Cuk et al.	2023	colectomy	compare the postoperative outcomes of RALS and CLS for complete mesocolic excision	Meta-analysis	-	55/5357	740 (14%)	4617 (86%)	Worldwide	RALS: 67.6; CLS: 66.5	right-sided colonic cancer	complete mesocolic excision	3	up to August 2021	(non)-comparative RCTs and NRCSs	Worldwide	RCTS: Cochrane Risk of Bias Tool (RoB2) NRCSs: MINORS	RE	Overall postoperative morbidity (≤ 90 days), anastomotic leakage, conversion rate to open surgery, intraoperative blood loss, surgical time, length of hospital stay, microradical (R0) resection rate, lymph node harvest, three- and five- year overall- and disease-free survival
Flynn et al.	2022	colectomy	systematically review and pool data comparing post-operative and oncological outcomes between RALS and CLS rectal resections	Meta-analysis	-	50/10445	4809 (46%)	5636 (54%)	Worldwide	N/A	rectal cancer	total mesorectal excision	4	1996 to 2021	all comparative studies	Worldwide	RCTs: Jadad scale NRCSs: Newcastle-Ottawa Scale	RE: continuous data CMH: categorical data	operating times, blood loss, conversion to open, time to return of bowel function and oral intake, complications, length of hospital stay, unplanned readmission, number of lymph nodes harvested, rates of incomplete resection and survival.
Gavriilidis et al.	2020	colectomy	assessing evidence on oncological adequacy, safety and efficiency of robotic vs laparoscopic total mesorectal excision for rectal cancers	Meta-analysis	-	25/4805	2413 (50%)	2392 (50%)	Worldwide	N/A	rectal cancer	total mesorectal excision	4	1995 to 2020	RCTs, retrospective and case-matched studies	Worldwide	Newcastle–Ottawa scale	FE and RE	operative time, estimated blood loss, conversion to open surgery, protective stoma, major morbidity, time to oral intake, number of lymph nodes harvested, distal resection margin, CRM, positive CRM, length of stay, readmission, local recurrence, erectile dysfunction, overall survival and 3-year disease-free survival
Jones et al.	2018	colectomy	compare outcomes in patients undergoing total meso-rectal excision by RALS vs CLS	Meta-analysis	-	28/5547	N/A	N/A	N/A	N/A	rectal cancer	total mesorectal excision	4	up to March 2018	all comparative studies	N/A	-	RE	Length of stay, operation time, blood loss, post-operative complications, mortality, positive circumferential resection margins, length of distal resection margins, lymph node harvesting, surgical site infections, time till first flatus, conversion rate, tumour recurrence and re-operation rate
Petz et al.	2021	colectomy	analyzing current evidence on complete mesocolic excision and providing a summary of its eventual benefits	Systematic Review	-	14/916	N/A	N/A	N/A	N/A	(right) colon cancer	complete mesocolic excision	1	2013 to 2021	case series and comparative studies	N/A	Newcastle–Ottawa scale	-	conversion rate, operative time, intra and postoperative complications, number of retrieved lymph nodes, overall and disease-free survival
Rausa et al.	2019	colectomy	a comprehensive evaluation of: pathological, surgical, and oncological outcomes among CLS, RALS and transanal TME in rectal cancer patients.	Network Meta-analysis	-	23/3003	1302 (43%)	1193 (40%)	N/A	61.7	rectal cancer	total mesorectal excision	2	up to September 2018	RCTs and NRCSs	Worldwide	ROBINS-I	RE	Pathological and oncological outcomes (complete, near complete, and incomplete mesorectum excision, radial margin involvement, lymph node harvest, local and distant recurrence), complication rate, anastomotic leak, wound infection, urinary dysfunction, bowel obstruction, reoperation, and 30-day mortality rate.
Flynn et al.	2021	colectomy	assess whether RALS proctocolectomy is safe, and does it have any advantages over CLS	Meta-analysis	-	9/640	286 (45%)	174 (27%)	Worldwide	N/A	multiple (ulcerative colitis, Crohn disease, polyps)	proctocolectomy with ileal-pouch anal anastomosis	3	1996 to 2020	comparative studies and case series.	Worldwide	Newcastle–Ottawa scale	CMH	mortality and complication rates (in particular, anastomotic leak and ileus), operating time, conversion to open surgery, length of stay, readmission rates, estimated blood loss, return of bowel function, reoperation rate, and functional and quality of life outcomes.
Roh et al.	2018	cholecystectomy colectomy hysterectomy nephrectomy prostatectomy	a comprehensive comparison of treatment outcomes between RALS and CLS based on RCTs on	Meta-analysis	-	27/1760	882 (50%)	878 (50%)	N/A	N/A	N/A	cholecystectomy colectomy hysterectomy nephrectomy prostatectomy	3	1981 to 2016	RCTs	Worldwide	Cochrane Risk of Bias Tool (RoB2)	RE for high heterogeneity, FE for low heterogeneity	total operative time, net operative time, estimated blood loss, number of transfusions, conversion rate, total complication rate, intra-operative complication rate, post-operative complication rate, length of hospital stay, and total operative costs.
Solaini et al.	2022	colectomy	comparing left CLS versus left RALS colectomy	Meta-analysis	-	11/52589	13506 (26%)	39083 (74%)	N/A	RALS: 60.1; CLS: 60.5	N/A	left hemicolectomy	3	2004 to 2022	all comparative studies	Korea, USA, Italy, China, Germany, Swiss, Turkey	Newcastle–Ottawa scale	RE	conversion to open surgery, blood loss, postoperative morbidity and mortality, harvested lymph nodes, anastomotic leak, postoperative hemorrhage, abdominal abscess, postoperative ileus, time to first flatus, non-surgical complications, wound infections, hospital stay, and incisional hernia and costs.
Genova et al.	2021	colectomy	compare CLS versus RALS for right colectomy with homogeneous subgroup analyses for extra- and intra-corporeal anastomosis	Meta-analysis	Subgroups: extra-corporeal anastomosis (EA), intra-corporeal anastomosis (IA) and combined	37/24193	2796 (12%)	21397 (88%)	N/A	N/A	N/A	right hemicolectomy with extra- or intracorporeal anastomosis	3	2003 to 2020	RCTs, NRCSs, pro- and retrospective comparitive studies	N/A	RCTs: Cochrane Risk of Bias Tool (RoB2) NRCSs: ROBINS-I case-control studies: Newcastle-Ottawa Scale	RE, CMH	length of hospital stay, operative and pathological results, survival, and total costs.
Lauka et al.	2020	colectomy	comparing the operative and postoperative outcomes of RALS vs. CLS right colectomy	Meta-analysis	-	27/20478	2314 (11%)	17791 (87%)	N/A	RALS: 68.4; CLS: 68.5	both oncological and non-oncological pathologies	right hemicolectomy	5	October 2007 to October 2019	RCTs and NRCSs	N/A	RCTs: Cochrane Risk of Bias Tool (RoB2) NRCSs: ROBINS-I	RE, CMH	operative time, conversion rate, estimated blood loss, number of retrieved lymph nodes, morbidity, mortality, readmission, reoperation 30 days after surgery, time to first flatus, length of hospital stay, 3 and 5 years overall survival and disease-free survival, total costs, surgery related costs, hospital stay related costs
Ma et al.	2019	colectomy	assess the clinical efficacy and safety of RALS right colectomy with CLS right colectomy	Meta-analysis	-	13/7769	674 (9%)	7095 (91%)	N/A	RALS: 65; CLS: 66	multiple (colon cancer, Crohn, diverticulitis)	right hemicolectomy	5	2007 to 2016	all comparative studies	Korea, Italy, USA, France	-	RE for high heterogeneity, FE for low heterogeneity	operative time, estimated blood loss, length of hospital stay, conversion rates to open surgery, postoperative complications
Rausa et al.	2019	colectomy	compare outcomes between RALS, CLS, laparoscopic assisted and open right hemicolectomy	Network Meta-analysis	-	48/5652	414 (8%)	1324 (23%)	N/A	66.6	right-sided colonic cancer	right hemicolectomy	3	1996 to 2018	RCTs and NRCSs	N/A	RCTs: Cochrane Risk of Bias Tool (RoB2) NRCSs: Newcastle-Ottawa Scale	RE	overall complications, anastomotic leak, surgical site infection, reoperation, 30-day mortality, and 60-day readmission rates, operative time, conversion rate, estimated blood loss, blood transfusion, hospital stay, and lymph node harvest, and RRH cost analysis.
Solaini et al.	2018	colectomy	systematically revise and meta-analyze RALS right hemicolectomy versus CLS right hemicolectomy	Meta-analysis	-	11/8257	869 (11%)	7388 (89%)	N/A	N/A	mainly right-sided colon cancer	right hemicolectomy	3	2000 to 2017	all comparative studies	USA, Korea, Italy, France	RCTs: Jadad scale NRCSs: MINORS	N/A	postoperative morbidity, mortality, blood loss, conversion to open surgery, harvested lymph node anastomotic leak, postoperative hemorrhage, abdominal abscess, postoperative ileus, time to first flatus, non-surgical complications, wound infections, hospital stay, and incisional hernia and costs
Tschann et al.	2022	colectomy	Revise and update current short- and long-term outcomes comparative literature on RALS vs CLS right hemicolectomy	Meta-analysis	-	26/16099	1842 (11%)	14257 (89%)	N/A	RALS: 69; CLS: 70	colorectal diseases	right hemicolectomy	3	2002 to 2020	all comparative studies	Worldwide	RCTs: Jadad scale cohort studies: MINORS	RE	postoperative morbidity, mortality, long-term oncological, blood loss, conversion rates, complications, time to first flatus, hospital stay and incisional hernia rate
Waters et al.	2020	colectomy	examine the rates of successful patient-oriented surgical outcomes in RALS compared to CLS right hemicolectomy for cancer.	Systematic Review	-	15/4072	831 (20%)	3241 (80%)	N/A	62-74	colorectal cancer	right hemicolectomy	5	1998 to 2017	all comparative studies	N/A	RCTs: Cochrane Risk of Bias Tool (RoB2) cohort studies: Newcastle-Ottawa Scale	-	postoperative ileus, anastomotic complication, surgical wound infection, length of stay (LOS), incisional hernia rate, conversion to open, margin status, lymph node harvest and overall morbidity and mortality.
Zhu et al.	2021	colectomy	compare the clinical efficacy of RALS right colectomy versus CLS in the treatment of right colon tumor.	Meta-analysis	-	10/1180	536 (45%)	644 (55%)	N/A	69	right-sided colonic cancer	right hemicolectomy	4	January 2011 to June 2020	all comparative studies	Italy, France, USA, Korea	Newcastle–Ottawa Scale	RE for high heterogeneity, FE for low heterogeneity	intraoperative and postoperative complications
Alshowaikh et al.	2021	hysterectomy	to evaluate and compare various patient and surgical outcomes of RALS with CLS hysterectomy	Systematic Review	-	25/57697	16826 (29%)	40871 (71%)	N/A	N/A	benign and malignant indications	hysterectomy	3	2016 to 2021	classical article, clinical study, journal article, observational study, or comparative study	Worldwide (13 countries)	RCTs: Cochrane Risk of Bias Tool (RoB2) NRCSs: Newcastle-Ottawa Scale	-	operating time, estimated blood loss, length of hospitalization, overall complications, survival, and cost
Prodromidou et al.	2020	hysterectomy	to evaluate the feasibility of RALS and CLS single-site hysterectomy in benign or malignant gynecological patients	Meta-analysis	single-site	6/412	150 (36%)	262 (64%)	N/A	N/A	benign or early-stage malignant gynecological conditions	single-site hysterectomy	4	up to September 2019	prospective and retrospective clinical trials	Italy, Turkey, Korea, USA	MINORS	RE	operative time, blood loss, hospital stay, complication rates, conversion to open surgery rates
Kampers et al.	2022	hysterectomy	to evaluate the peri- and postoperative morbidities and complications of RALS, CLS and open radical hysterectomy	Meta-analysis	-	27/15713	479 (3%)	7213 (46%)	Worldwide	N/A	early cervical cancer	radical hysterectomy	2	2007 to 2020	comparative peer-reviewed studies	USA, Asia, Europe, Brazil	Cochrane Risk of Bias Tool (RoB2)	RE for high heterogeneity, FE for low heterogeneity	estimated blood loss, mean hospital stay, operation time, intraoperative morbidity, postoperative morbidity
Marchand et al.	2021	hysterectomy	perform a systematic review to identify any differences in patient safety and expected incidence of complications in (robot-assisted) gynecologic laparoscopic procedures	Meta-analysis	-	6/901	445 (49%)	436 (51%)	N/A	44.1-67.8	any	laparoscopic gynecologic procedures (mainly hysterectomy)	6	up to April 1, 2021	RCTs	N/A	Cochrane Risk of Bias Tool (RoB2)	RE for high heterogeneity, FE for low heterogeneity	overall intraoperative or postoperative complications and hemorrhage, estimated blood loss (EBL), vaginal cuff dehiscence, postoperative urinary tract or wound infections, intraoperative hemoglobin level decrease, and length of postoperative hospital stay
Zhang et al.	2019	hysterectomy	perform a meta-analysis of high-quality studies comparing RALS radical hysterectomy with CLS and open for the treatment of cervical cancer	Meta-analysis	-	12/2197	932 (42%)	373 (17%)	USA, South Korea, Italy, France, Sweden, Norway	N/A	cervical cancer	radical hysterectomy	4	up to February 2018	prospective or retrospective cohorts	USA, South Korea, Italy, France, Sweden, Norway	MINORS Newcastle-Ottawa Scale	RE	conversion rate, operation time, intraoperative estimated blood loss (EBL), length of hospital stay (LOS), morbidity, mortality, number of retrieved lymph nodes (RLNs), and long-term oncologic outcomes.
Guo et al.	2023	hysterectomy	to evaluate the efficacy and safety of five different approaches to cervical cancer surgery.	Network Meta-analysis	subgroups: open, laparoscopic, robotic, vaginal assisted laparoscopic, laparoscopic lymphadenectomy	30/11353	2258 (20%)	3772 (33%)	Worldwide	N/A	cervical cancer	radical hysterectomy	4	up to December 31, 2020	observational studies	Worldwide	Newcastle-Ottawa Scale	RE	overall survival, progression-free survival, recurrence, and complication rates
Jin et al.	2018	hysterectomy	to compare intraoperative and postoperative outcomes in way of RALS, CLS and open radical hysterectomy in the treatment of early-stage cervical cancer	Network Meta-analysis	-	17/2090	229 (11%)	913 (44%)	Caucasians and Asians	N/A	cervical cancer	radical hysterectomy	3	2007 to 2015	clinical controlled trials (CCTs)	Italy, Turkey, Korea, USA, China, Brazil	Physiotherapy Evidence Database scale (PEDro)	RE for high heterogeneity, FE for low heterogeneity	estimated blood loss (ml), hospital stay (days), intraoperative complications, number of pelvic lymph nodes removed, operative time (min) and postoperative complications
Hwang et al.	2020	hysterectomy	to compare the risks of intraoperative and postoperative urologic complications after RALS vs CLS radical hysterectomy	Meta-analysis	-	23/2855	986 (35%)	1869 (65%)	Italy, USA, South Korea	N/A	cervical cancer	radical hysterectomy	3	2008 to March 2019	all comparative studies	North America, Asia and Europe	-	FE	perioperative urologic complications. Intraoperative urologic complications included bladder injury and ureteral injury. Postoperative urologic complications included ureterovaginal fistulas, vesicovaginal fistulas, ureteral stenosis, hydronephrosis, and urinary tract infection.
Lawrie et al.	2019	hysterectomy	To assess the effectiveness and safety of RALS in the treatment of women with benign and malignant gynaecological disease.	Meta-analysis	-	12/1016	N/A	N/A	Worldwide	N/A	benign and malignant gynaecological disease	hysterectomy	3	up to January 2018	RCTs	Worldwide	Cochrane Risk of Bias Tool (RoB2)	RE	Intraoperative complications including injury to the bladder, ureters, bowel, blood vessels, and nerves; Postoperative complications including vascular, wound infection and breakdown, gastrointestinal, incisional hernia, neurological, respiratory, and urinary complications
Zahid et al.	2022	nephrectomy, prostatectomy	To establish the feasibility of RALS in urology in terms of the applications, merits, demerits, postoperative and oncological outcomes and compare it with CLS	Systematic Review	radical nephrectomy, partial nephrectomy, nephroureterectomy, prostatectomy	39/53349	13598 (25%)	27456 (51%)	N/A	N/A	any urological condition	prostatectomy, cystectomy, radical/partial nephrectomy, nephroureterectomy, ureteral reimplantation, adrenalectomy, inguinal lymphadenectomy	5	2000 to 2021	RCTs and cohort studies	N/A	RCTs: Cochrane Risk of Bias Tool (RoB2) NRCSs: Newcastle-Ottawa Scale	-	oncological outcomes, time to flatus, renal function, complications, mortality, length of hospital stay, blood loss, mean operative time, warm ischemia time, need for postoperative analgesia.
Veccia et al.	2020	nephrectomy	To review the literature inherent RALS nephroureterectomy and to compare its outcomes with those of other nephroureterectomy techniques	Meta-analysis	-	80/87291	10155 (12%)	31093 (36%)	N/A	67.63	N/A	nephroureterectomy	3	2000 to April 2019	Comparative and non-comparative retrospective, prospective, non- and randomized studies	N/A	RCTs: Jadad scale NRCSs: Newcastle-Ottawa Scale	RE	estimated blood loss (EBL), operative time (OT), intraoperative complications, transfusions, overall complications, major complications (Clavien ≥ 3), and length of stay;
Li et al.	2020	nephrectomy	to compare the perioperative outcomes between RARN and LRN	Meta-analysis	-	7/1832	726 (40%)	1070 (58%)	N/A	N/A	renal cell carcinoma	nephrectomy	4	January 2005 to January 2020	RCT, cohort or case-control study	N/A	ROBINS-I Newcastle-Ottawa Scale	RE for high heterogeneity, FE for low heterogeneity	perioperative outcomes including operating time (OT), estimated blood loss (EBL), length of stay (LOS), conversion rate, and complications
Crocerossa et al.	2021	nephrectomy	To compare the outcomes of RALS to those of CLS and open surgery in patients undergoing radical nepphrectomy for renal cell carcinoma	Meta-analysis	-	12/64221	18963 (30%)	7033 (11%)	USA, Germany	N/A	renal cell carcinoma	radical nephrectomy	3	January 2000 to May 2020	comparative retrospective and prospective studies	USA, Germany	Newcastle-Ottawa scale	RE	perioperative outcomes (operative time, blood loss, transfusion rate, complication rate, length of hospital stay), survival outcomes (overall, cancer-specific, recurrence-free survival), cost-effectiveness outcomes (partial or total covered costs or charges for each approach)
Wang et al.	2019	nephrectomy	to assess the safety and efficacy of RALS donor nephrectomy compared with CLS	Meta-analysis	-	7/514	250 (49%)	264 (51%)	N/A	N/A	-	donor nephrectomy	3	1999 to 2018	RCTs and retrospective comparative study	N/A	RCTs: Cochrane Risk of Bias Tool (RoB2) NRCSs: Newcastle-Ottawa Scale	RE for high heterogeneity, FE for low heterogeneity	length of hospital stay, operative time (skin to skin time), warm ischemia time, estimated blood loss, postoperative pain, and the incidence of intraoperative complications.
Sharma et al.	2022	nephrectomy	to analyze perioperative outcomes following RALS partial nephrectomy for complex renal masses and to compare perioperative outcomes following open, CLS and RALS.	Meta-analysis	-	22/3785	2659 (70%)	480 (13%)	N/A	57.9	highly complex renal masses	partial nephrectomy	3	up to 2020	RCTs and NRCSs	USA, Italy, China, India, Australia, South Korea, Germany, Belgium	RCTs: IHE checklist NRCSs: Newcastle-Ottawa Scale	RE for high heterogeneity, FE for low heterogeneity	duration of surgery, estimated blood loss, number of transfusions, length of hospital stay, positive surgical margins, surgical complications, and warm ischemia time
Tang et al.	2020	nephrectomy	to assess perioperative and long-term oncologic and functional outcomes of RALS partial nephrectomy compared to CLS and open	Systematic Review	-	7/-	N/A	N/A	N/A	50-70	renal cell carcinoma	partial nephrectomy	3	2010 to 2019	RCTS and observational studies	N/A	observational studies: ROBINS-I	-	intraoperative and postoperative outcomes, long-term functional outcomes, oncologic outcomes, estimated blood loss, operating room time, warm ischemia time, major complications, length of stay
Xiao et al.	2020	nephrectomy	Compare and evaluate surgical techniques (RALS, CLS, hand-assisted CLS, open) used for living donor nephrectomy (LDN).	Network meta-analysis	-	43/6772	250 (4%)	2710 (40%)	America, Europe, Oceania, and Asia	N/A	-	donor nephrectomy	3	up to July 2020	all comparative studies	UK, Australia, Norway, Netherlands, Iran, India, USA, Canada, Brazil, Indiana, Korea, Sweden, Germany, Japan, Tai Wan, Switzerland, Thailand	Cochrane Risk of Bias Tool (RoB2)	RE/FE	warm ischemia time, estimated blood loss, operation time, intraoperative and postoperative donor complications, length of hospital stay
Du et al.	2018	prostatectomy	to assess the perioperative, functional, and oncologic outcomes after RALS, CLS, and open radical prostatectomy for prostate cancer	Meta-analysis	-	33/29614	10864 (37%)	7905 (27%)	worldwide	RALS: 32.6–69.05 CLS: 57.2–62.5	prostate cancer	radical prostatectomy	6	up to April 2017	retrospective and prospective comparative studies	USA, France, Japan, Korea, Germany, Grenada, UK, Belgium, Sweden, Turkey, Switzerland, Italy, Australia	-	RE for high heterogeneity, FE for low heterogeneity	operation time, blood loss, and transfusion rate; oncological outcomes included PSM; and functional outcomes
Carbonara et al.	2021	prostatectomy	to provide an analysis of the comparative outcomes of RALS versus CLS prostatectomy of prostate cancer patients	Meta-analysis	-	26/13752	6135 (45%)	7617 (55%)	N/A	N/A	prostate cancer	radical prostatectomy	3	2002 to 2021	retrospective or prospective comparative studies	N/A	Newcastle-Ottawa scale	RE	operative time, estimated blood loss, length of hospital stay, catheterization duration, overall postoperative complications, major complications
Wang et al.	2019	prostatectomy	To evaluate the efficacy and safety of RALS radical prostatectomy compared to CLS for the treatment of prostate cancer.	Meta-analysis	-	16/7952	5170 (65%)	2782 (35%)	N/A	61.8	prostate cancer	radical prostatectomy	4	2005 to 2018	prospective controlled study or retrospective case-control study	N/A	Jadad scale	RE for high heterogeneity, FE for low heterogeneity	operation time, intraoperative blood loss, blood transfusion rate, surgical margin positive rate and hospitalization time, postoperative urinary function and postoperative complications, and follow-up time more than 1 year
Pandolfo et al.	2022	prostatectomy	to provide a wide-ranging analysis of the currently available evidence, comparing safety and effectiveness of RALS, versus open, CLS simple prostatectomy and laser EEP	Meta-analysis	-	15/6659	1938 (29%)	1175 (18%)	N/A	69.3	large benign prostatic hyperplasia	simple prostatectomy	3	2015 to 2022	retrospective and prospective studies	N/A	RCTs: Cochrane Risk of Bias Tool (RoB2) NRCSs: Newcastle-Ottawa Scale	RE	operative time, estimated blood loss, transfusion rate, complication rate, length of hospital stay, functional outcomes
Li et al.	2022	prostatectomy	to perform a pooled analysis to compare the safety and efficacy profiles of CLS and RALS simple prostatectomy	Meta-analysis	-	5/1928	753 (39%)	1175 (61%)	Italy, Venezuela, USA	68	large benign prostatic hyperplasia	simple prostatectomy	5	up to August 2022	prospective comparative, retrospective or RCT studies	Italy, Venezuela, USA	RCTs: Cochrane Risk of Bias Tool (RoB2) NRCSs: ROBINS-I	RE	operative time, blood loss, hospital stay, catheterization time, conversion and transfusion rate, overall complications
Kordan et al.	2020	prostatectomy	to review case and comparative series of RALS simple prostatectomy	Systematic Review	-	35/-	1564 (-%)	N/A	N/A	N/A	large benign prostatic hyperplasia	simple prostatectomy	3	2008 to 2020	case series and comparative studies	N/A	-	-	operative time, estimated blood loss, postoperative day of catheter removal, length of hospital stay, complications, incontinence and erectile dysfunction, conversion to open surgery
